# Supplementary material for: Evolutionary analysis of endogenous intronic retroviruses in primates reveals an enrichment in transcription binding sites associated with key regulatory processes
Source: PeerJ journal article supplement (doi:10.7717/peerj.14431), 2022-12-22
Supplement: Supplementary_file_1.pdf [file Supplementary_file_1.pdf]

**Table S1.** Genomic locations of *de novo* predicted ERVs in humans.

| ERV location                | Intragenic ERVs | Non-intragenic ERVs |            |
|-----------------------------|-----------------|---------------------|------------|
|                             | Gene name       | Adjacent genes      |            |
| Chr19:44862867-44869439     | NECTIN-2        |                     |            |
| Chr20:37149869-37161833     | MROH8           |                     |            |
| Chr9:128894025-128897010    | LRRC8A          |                     |            |
| Chr1:211835983-211845425    | LPGAT1-AS1      |                     |            |
| Chr2:186073944-186078649    | LINC01473       |                     |            |
| Chr5:61205536-61207819      | SMIM15-AS1      |                     |            |
| Chr1:216032484-216038211    | USH2A           |                     |            |
| Chr2:46903003-46905220      | MCFD2           |                     |            |
| Chr3:18172037-18174273      | TBC1D5          |                     |            |
| Chr3:6661070-6663698        | GRM7-AS3        |                     |            |
| Chr4:165282824-165285097    | KLHL2           |                     |            |
| Chr7:116004827-116007089    | TFEC            |                     |            |
| Chr1:37907815-37914173      | INPP5B          |                     |            |
| Chr6:94553915-94559610      | ENSG00000289178 |                     |            |
| Chr11:14524261-14529062     | PSMA1           |                     |            |
| Chr1:206052519-206058912    | RHEX            |                     |            |
| Chr6:74468144-74474614      | ENSG00000223786 |                     |            |
| Chr20:15979869-15986246     | MACROD2         |                     |            |
| Chr20:15147683-15153522     | MACROD2         |                     |            |
| Chr4:88538134-88546230      | DET1            |                     |            |
| Chr8:105619254-105621894    | ZFPM2           |                     |            |
| Chr3.12:125890459-125899596 | FAM86JP         |                     |            |
| Chr10:6824176-6833641       | LINC00707       |                     |            |
| Chr14:67706311-67714076     | GPHN            |                     |            |
| Chr9:74515385-74517144      | RORB            |                     |            |
| Chr16:70338524-70347966     | DDX19A          |                     |            |
| Chr14:77667816-77669413     | COX6CP11        |                     |            |
| NT_187586.1:200769-203163   | DEAF1           |                     |            |
| Chr3:45076355-45078647      |                 | CLEC3B              | CDCP1      |
| Chr4:98703629-98705957      |                 | TSPAN5              | EIF4E      |
| Chr10:6379439-6381695       |                 | DPPA5P3             | PRKCQ      |
| Chr13:103267226-103269529   |                 | SLC10A2             | ATP6V1G1P7 |
| ChrX:123757939-123760219    |                 | THOC2               | RNU7-69P   |
| ChrX:46170451-46172772      |                 | PCNAP3              | ACTBP1     |
| ChrX:57639022-57641324      |                 | ZXDB                | NLRP2B     |
| Chr1:65643203-65648034      |                 | LEPR                | PDE4B      |
| Chr3:27549571-27553803      |                 | SLC4A7              | LINC01980  |
| Chr3:67037862-67044184      |                 | KBTBD8              | SUCLG2     |
| Chr8:115212253-115217982    |                 | TRPS1               | CARSP2     |
| ChrX:111543805-111549673    |                 | SERTM2              | EIF4BP7    |
| NT_187675.1:264534-270837   |                 | FCAR                | NCR1       |
| NT_187676.1:170245-176548   |                 | FCAR                | NCR1       |
| NT_187683.1:168513-174816   |                 | FCAR                | NCR1       |
| Chr9:86360724-86367962      |                 | ZCCHC6              |            |

|                              |  |                 |            |
|------------------------------|--|-----------------|------------|
| Chr6:28766179-28776541       |  | TRA-TGC6-1      |            |
| NT_113891.3:256873-267245    |  | TRIM27          |            |
| NW_003871091.1:114309-128756 |  | KRT40           | KRT39      |
| Chr11:118721015-118730174    |  | TREH            | DDX6       |
| Chr1:213025480-213032442     |  | RPS6KC1         | ANGEL2     |
| Chr2:152273628-152279762     |  | LOC105373689    | FMNL2      |
| Chr8:52979990-52984068       |  | NPBWR1          | OPRK1      |
| Chr19:9711509-9717966        |  | ZNF562          | ZNF846     |
| Chr2:40671993-40678381       |  | SLC8A1          |            |
| Chr3:144903447-144910073     |  | GM2AP1          |            |
| Chr10:37275132-37284840      |  | ANKRD30A        | TMEM161BP1 |
| Chr10:85184306-85190827      |  | CCSER2          | GRID1      |
| Chr11:35047926-35050201      |  | PDHX            | CD44       |
| Chr1:38425114-38430783       |  | POU3F1          | RRAGC      |
| Chr16:35267618-35277076      |  | ENSG00000260958 |            |
| Chr3:91379068-91392888       |  | ENSG00000283367 |            |

**Table S2. Summary of RetroTector analysis and alignments between INPP5B orthologous vs ERV region in the human gene.** The species found in the table correspond to primates; the species highlighted in purple are those that were detected in RetroTector and BLASTN.

| INPP5B |                                     |             |                |          |            |
|--------|-------------------------------------|-------------|----------------|----------|------------|
| N°     | Species                             | RetroTector | BLASTN         |          |            |
|        |                                     |             | Query coverage | e-value  | % identity |
| 1      | <i>Carlito syrichta</i>             | +           | 4%             | 3.00E-20 | 82.41%     |
| 2      | <i>Cebus capucinus imitator</i>     | -           | 4%             | 1.00E-72 | 83.17%     |
| 3      | <i>Aotus nancymaae</i>              | -           | 4%             | 5.00E-53 | 79.48%     |
| 4      | <i>Saimiri boliviensis</i>          | -           | 7%             | 9.00E-80 | 86.11%     |
| 5      | <i>Nomascus leucogenys</i>          | +           | 97%            | 0        | 95.40%     |
| 6      | <i>Pongo abelii</i>                 | -           | 84%            | 0        | 88.90%     |
| 7      | <i>Gorilla gorilla</i>              | +           | 97%            | 0        | 97.43%     |
| 8      | <i>Pan troglodytes</i>              | +           | 97%            | 0        | 98.98%     |
| 9      | <i>Pan paniscus</i>                 | +           | 97%            | 0        | 98.85%     |
| 10     | <i>Rhinopithecus roxellana</i>      | +           | 97%            | 0        | 91.84%     |
| 11     | <i>Rhinopithecus bieti</i>          | -           | 83%            | 0        | 91.63%     |
| 12     | <i>Colobus angolensis palliatus</i> | +           | 89%            | 0        | 91.40%     |

|    |                                  |   |      |          |        |
|----|----------------------------------|---|------|----------|--------|
| 13 | <i>Ptilocolobus tephrosceles</i> | - | 96%  | 0        | 91.51% |
| 14 | <i>Chlorocebus sabaesus</i>      | + | 97%  | 0        | 89.69% |
| 15 | <i>Cercocebus atys</i>           | + | 97%  | 0        | 90.40% |
| 16 | <i>Mandrillus leucophaeus</i>    | + | 93%  | 0        | 90.47% |
| 17 | <i>Papio anubis</i>              | - | 4%   | 2.00E-83 | 84.47% |
| 18 | <i>Theropithecus gelada</i>      | - | 97%  | 0        | 90.34% |
| 19 | <i>Macaca fascicularis</i>       | - | 100% | 0        | 90.93% |
| 20 | <i>Macaca nemestrina</i>         | + | 93%  | 0        | 90.62% |
| 21 | <i>Macaca mulatta</i>            | - | 25%  | 0        | 89.91% |
| 22 | <i>Otolemur garnetti</i>         | - | 4%   | 6.00E-20 | 76.72% |
| 23 | <i>Propithecus coquereli</i>     | - | -    |          |        |
| 24 | <i>Microcebus murinus</i>        | - | 6%   | 5.00E-43 | 77.46% |

**Table S3. Summary of RetroTector analysis and alignments between DET1 orthologous vs ERV region in the human gene.** The species found in the table correspond to primates; the species highlighted in purple are those that were detected in RetroTector and BLASTN.

| DET1 |                                 |             |                |         |            |
|------|---------------------------------|-------------|----------------|---------|------------|
| N°   | Species                         | RetroTector | BLASTN         |         |            |
|      |                                 |             | Query coverage | e-value | % identity |
| 1    | <i>Carlito syrichta</i>         | -           | -              |         |            |
| 2    | <i>Cebus capucinus imitator</i> | -           | -              |         |            |
| 3    | <i>Aotus nancymaae</i>          | -           | -              |         |            |
| 4    | <i>Saimiri boliviensis</i>      | -           | -              |         |            |
| 5    | <i>Nomascus leucogenys</i>      | +           | 88%            | 0       | 93.92%     |
| 6    | <i>Pongo abelii</i>             | +           | 88%            | 0       | 93.66%     |
| 7    | <i>Gorilla gorilla</i>          | +           | 92%            | 0       | 97.34%     |
| 8    | <i>Pan troglodytes</i>          | +           | 92%            | 0       | 98.51%     |
| 9    | <i>Pan paniscus</i>             | +           | 92%            | 0       | 98.55%     |
| 10   | <i>Rhinopithecus roxellana</i>  | -           | 23%            | 0.00    | 82.69%     |

|    |                                     |   |     |           |        |
|----|-------------------------------------|---|-----|-----------|--------|
| 11 | <i>Rhinopithecus bieti</i>          | - | -   |           |        |
| 12 | <i>Colobus angolensis palliatus</i> | - | 6%  | 4.00E-101 | 79.89% |
| 13 | <i>Ptilocolobus tephrosceles</i>    | - | -   |           |        |
| 14 | <i>Chlorocebus sabaeus</i>          | - | 12% | 7.00E-175 | 78.97% |
| 15 | <i>Cercocebus atys</i>              | - | 8%  | 3.00E-118 | 77.98% |
| 16 | <i>Mandrillus leucophaeus</i>       | - | 11% | 2.00E-136 | 76.68% |
| 17 | <i>Papio anubis</i>                 | - | 23% | 0         | 82.84% |
| 18 | <i>Theropithecus gelada</i>         | - | 23% | 0         | 83.82% |
| 19 | <i>Macaca fascicularis</i>          | - | 23% | 0         | 82.56% |
| 20 | <i>Macaca nemestrina</i>            | - | 11% | 1.00E-97  | 76.04% |
| 21 | <i>Macaca mulatta</i>               | - | 23% | 0         | 82.76% |
| 22 | <i>Otolemur garnetti</i>            | - | -   |           |        |
| 23 | <i>Propithecus coquereli</i>        | - | -   |           |        |
| 24 | <i>Microcebus murinus</i>           | - | -   |           |        |

**Table S4. Summary of RetroTector analysis and alignments between PSMA1 orthologous vs ERV region in the human gene.** The species found in the table correspond to primates; the species highlighted in purple are those that were detected in RetroTector and BLASTN.

| PSMA1 |                                 |             |                |         |            |
|-------|---------------------------------|-------------|----------------|---------|------------|
| N°    | Species                         | RetroTector | BLASTN         |         |            |
|       |                                 |             | Query coverage | e-value | % identity |
| 1     | <i>Carlito syrichta</i>         | -           | -              |         |            |
| 2     | <i>Cebus capucinus imitator</i> | -           | -              |         |            |
| 3     | <i>Aotus nancymae</i>           | -           | -              |         |            |
| 4     | <i>Saimiri boliviensis</i>      | -           | -              |         |            |
| 5     | <i>Nomascus leucogenys</i>      | -           | 52%            | 0       | 95.84%     |
| 6     | <i>Pongo abelii</i>             | -           | -              |         |            |
| 7     | <i>Gorilla gorilla</i>          | +           | 100%           | 0       | 97.88%     |
| 8     | <i>Pan troglodytes</i>          | +           | 100%           | 0       | 98.38%     |

|    |                                     |   |      |   |        |
|----|-------------------------------------|---|------|---|--------|
| 9  | <i>Pan paniscus</i>                 | + | 100% | 0 | 98.40% |
| 10 | <i>Rhinopithecus roxellana</i>      | - |      | - |        |
| 11 | <i>Rhinopithecus bieti</i>          | - |      | - |        |
| 12 | <i>Colobus angolensis palliatus</i> | + |      | - |        |
| 13 | <i>Ptilocolobus tephrosceles</i>    | - |      | - |        |
| 14 | <i>Chlorocebus sabaeus</i>          | - |      | - |        |
| 15 | <i>Cercocebus atys</i>              | - |      | - |        |
| 16 | <i>Mandrillus leucophaeus</i>       | - |      | - |        |
| 17 | <i>Papio anubis</i>                 | - |      | - |        |
| 18 | <i>Theropithecus gelada</i>         | - |      | - |        |
| 19 | <i>Macaca fascicularis</i>          | + |      | - |        |
| 20 | <i>Macaca nemestrina</i>            | - |      | - |        |
| 21 | <i>Macaca mulatta</i>               | - |      | - |        |
| 22 | <i>Otolemur garnetti</i>            | - |      | - |        |
| 23 | <i>Propithecus coquereli</i>        | - |      | - |        |
| 24 | <i>Microcebus murinus</i>           | - |      | - |        |

**Table S5. Summary of RetroTector analysis and alignments between USH2A orthologous vs ERV region in the human gene.** The species found in the table correspond to primates; the species highlighted in purple are those that were detected in RetroTector and BLASTN

| USH2A |                                 |             |                |         |            |
|-------|---------------------------------|-------------|----------------|---------|------------|
| N°    | Species                         | RetroTector | BLASTN         |         |            |
|       |                                 |             | Query coverage | e-value | % identity |
| 1     | <i>Carlito syrichta</i>         | -           |                | -       |            |
| 2     | <i>Cebus capucinus imitator</i> | -           | 45%            | 0       | 88.43%     |
| 3     | <i>Aotus nancymae</i>           | -           | 47%            | 0       | 88.42%     |
| 4     | <i>Saimiri boliviensis</i>      | -           | 39%            | 0       | 87.11%     |
| 5     | <i>Nomascus leucogenys</i>      | +           | 100%           | 0       | 95.91%     |

|    |                                     |   |      |          |        |
|----|-------------------------------------|---|------|----------|--------|
| 6  | <i>Pongo abelii</i>                 | + | 52%  | 0        | 95.78% |
| 7  | <i>Gorilla gorilla</i>              | + | 100% | 0        | 98.15% |
| 8  | <i>Pan troglodytes</i>              | + | 100% | 0        | 98.66% |
| 9  | <i>Pan paniscus</i>                 | + | 100% | 0        | 98.52% |
| 10 | <i>Rhinopithecus roxellana</i>      | - | 98%  | 0        | 91.19% |
| 11 | <i>Rhinopithecus bieti</i>          | - | 98%  | 0        | 91.10% |
| 12 | <i>Colobus angolensis palliatus</i> | - | 98%  | 0        | 91.88% |
| 13 | <i>Ptilocolobus tephrosceles</i>    | + | 98%  | 0        | 91.39% |
| 14 | <i>Chlorocebus sabaeus</i>          | - | 98%  | 0        | 91.59% |
| 15 | <i>Cercocebus atys</i>              | - | 98%  | 0        | 91.53% |
| 16 | <i>Mandrillus leucophaeus</i>       | - | 98%  | 0        | 91.20% |
| 17 | <i>Papio anubis</i>                 | - | 98%  | 0        | 91.51% |
| 18 | <i>Theropithecus gelada</i>         | - | 98%  | 0        | 91.29% |
| 19 | <i>Macaca fascicularis</i>          | - | 98%  | 0        | 91.28% |
| 20 | <i>Macaca nemestrina</i>            | - | 98%  | 0        | 91.29% |
| 21 | <i>Macaca mulatta</i>               | - | 98%  | 0        | 91.23% |
| 22 | <i>Otolemur garnetti</i>            | + | 11%  | 2.00E-40 | 72.99% |
| 23 | <i>Propithecus coquereli</i>        | + | -    |          |        |
| 24 | <i>Microcebus murinus</i>           | + | 6%   | 3.00E-49 | 77.44% |

**Table S6. Summary of RetroTector analysis and alignments between MACROD2 orthologous vs ERV1 region in the human gene.** The species found in the table correspond to primates; the species highlighted in purple are those that were detected in RetroTector and BLASTN

| MACROD2-ERV1 |                                 |             |                |         |            |
|--------------|---------------------------------|-------------|----------------|---------|------------|
| N°           | Species                         | RetroTector | BLASTN         |         |            |
|              |                                 |             | Query coverage | e-value | % identity |
| 1            | <i>Carlito syrichta</i>         | -           | -              |         |            |
| 2            | <i>Cebus capucinus imitator</i> | +           | -              |         |            |
| 3            | <i>Aotus nancymae</i>           | +           | -              |         |            |

|    |                                     |   |      |           |        |
|----|-------------------------------------|---|------|-----------|--------|
| 4  | <i>Saimiri boliviensis</i>          | - | -    |           |        |
| 5  | <i>Nomascus leucogenys</i>          | + | 100% | 0         | 94.95% |
| 6  | <i>Pongo abelii</i>                 | + | 15%  | 0         | 95.42% |
| 7  | <i>Gorilla gorilla</i>              | + | 100% | 0         | 97.60% |
| 8  | <i>Pan troglodytes</i>              | + | 100% | 0         | 98.39% |
| 9  | <i>Pan paniscus</i>                 | + | 100% | 0         | 97.96% |
| 10 | <i>Rhinopithecus roxellana</i>      | + | 100% | 0         | 80.71% |
| 11 | <i>Rhinopithecus bieti</i>          | + | 55%  | 0         | 81.07% |
| 12 | <i>Colobus angolensis palliatus</i> | + | 85%  | 0         | 84.49% |
| 13 | <i>Ptilocolobus tephrosceles</i>    | + | 100% | 0         | 80.11% |
| 14 | <i>Chlorocebus sabaeus</i>          | + | -    |           |        |
| 15 | <i>Cercocebus atys</i>              | - | 95%  | 0         | 81.99% |
| 16 | <i>Mandrillus leucophaeus</i>       | + | -    |           |        |
| 17 | <i>Papio anubis</i>                 | + | 100% | 0         | 81.78% |
| 18 | <i>Theropithecus gelada</i>         | + | 100% | 0         | 82.04% |
| 19 | <i>Macaca fascicularis</i>          | - | 100% | 0         | 81.51% |
| 20 | <i>Macaca nemestrina</i>            | + | 26%  | 4.00E-154 | 81.47% |
| 21 | <i>Macaca mulatta</i>               | + | 100% | 0         | 81.51% |
| 22 | <i>Otolemur garnetti</i>            | - | -    |           |        |
| 23 | <i>Propithecus coquereli</i>        | - | -    |           |        |
| 24 | <i>Microcebus murinus</i>           | - | -    |           |        |

**Table S7. Summary of RetroTector analysis and alignments between MACROD2 orthologous vs ERV2 region in the human gene.** The species found in the table correspond to primates; the species highlighted in purple are those that were detected in RetroTector and BLASTN

| MACROD2-ERV2   |                         |             |                |         |            |
|----------------|-------------------------|-------------|----------------|---------|------------|
| N <sup>o</sup> | Species                 | RetroTector | BLASTN         |         |            |
|                |                         |             | Query coverage | e-value | % identity |
| 1              | <i>Carlito syrichta</i> | -           | -              |         |            |

|    |                                     |   |      |          |        |
|----|-------------------------------------|---|------|----------|--------|
| 2  | <i>Cebus capucinus imitator</i>     | + |      | -        |        |
| 3  | <i>Aotus nancymae</i>               | + |      | -        |        |
| 4  | <i>Saimiri boliviensis</i>          | - |      | -        |        |
| 5  | <i>Nomascus leucogenys</i>          | + |      | -        |        |
| 6  | <i>Pongo abelii</i>                 | + | 100% | 0        | 94%    |
| 7  | <i>Gorilla gorilla</i>              | + |      | -        |        |
| 8  | <i>Pan troglodytes</i>              | + | 100% | 0        | 97.91% |
| 9  | <i>Pan paniscus</i>                 | + | 100% | 0        | 97.91% |
| 10 | <i>Rhinopithecus roxellana</i>      | + | 12%  | 5.00E-91 | 88.24% |
| 11 | <i>Rhinopithecus bieti</i>          | - |      | -        |        |
| 12 | <i>Colobus angolensis palliatus</i> | + | 9%   | 4.00E-87 | 87.50% |
| 13 | <i>Ptilocolobus tephrosceles</i>    | + | 9%   | 1.00E-87 | 87.50% |
| 14 | <i>Chlorocebus sabaeus</i>          | + | 9%   | 1.00E-87 | 87.50% |
| 15 | <i>Cercocebus atys</i>              | - |      | -        |        |
| 16 | <i>Mandrillus leucophaeus</i>       | + | 9%   | 1.00E-91 | 88.28% |
| 17 | <i>Papio anubis</i>                 | + | 9%   | 8.00E-74 | 84.00% |
| 18 | <i>Theropithecus gelada</i>         | + | 11%  | 5.00E-91 | 88.24% |
| 19 | <i>Macaca fascicularis</i>          | - | 9%   | 1.00E-87 | 87.54% |
| 20 | <i>Macaca nemestrina</i>            | + | 9%   | 1.00E-91 | 88.28% |
| 21 | <i>Macaca mulatta</i>               | + | 9%   | 3.00E-88 | 87.59% |
| 22 | <i>Otolemur garnetti</i>            | - |      | -        |        |
| 23 | <i>Propithecus coquereli</i>        | + |      | -        |        |
| 24 | <i>Microcebus murinus</i>           | - |      | -        |        |

**Table S8. Summary of RetroTector analysis and alignments between INPP5B paralogous vs ERV region in the human gene.** Only one positive result in RetroTector was found in SYNJ1; however, according to the alignment result, it is not the same retroviral sequence. Therefore, it is a different ERV to the one found in the INPP5B gene.

| Paralogues | RetroTector | BLASTN |
|------------|-------------|--------|
|------------|-------------|--------|



|        |   |  |
|--------|---|--|
| OCRL   | - |  |
| SYNJ1  | + |  |
| SYNJ2  | - |  |
| INPP5J | - |  |
| INPP5D | - |  |
| INPP5F | - |  |
| INPP5K | - |  |
| FIG4   | - |  |
| SACM1L | - |  |
| SH2D1A | - |  |
| SH2D1B | - |  |

**Table S9. Summary of RetroTector analysis and alignments between USH2A paralogous vs ERV region in the human gene.** Only two positive results in RetroTector were found in LAMA2 and NTN4; however, according to the alignment result, it is not the same retroviral sequence. Therefore, it is a different ERV to the one found in the USH2A gene.

| Paralogues     | RetroTector | BLASTN |
|----------------|-------------|--------|
| LAMA1          | -           |        |
| NTNG2          | -           |        |
| HSPG2          | -           |        |
| ATRN           | -           |        |
| EGFLAM         | -           |        |
| MSANTD3-TMEFF1 | -           |        |
| TMEFF1         | -           |        |
| LAMA4          | -           |        |

|       |   |                                                                                    |
|-------|---|------------------------------------------------------------------------------------|
| LAMA2 | + | 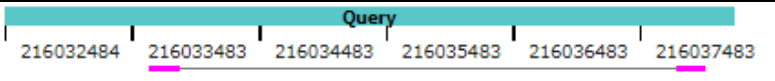  |
| NTN4  | + |  |
| MEGF9 | - |  |
| LAMA3 | - |  |
| NTN1  | - |  |

**Table S10.** Somatic variants associated with tumors along the sections annotated as ERVs.

| <b>Cosmic variant ID*</b> | <b>Phenotype</b>                        |
|---------------------------|-----------------------------------------|
| <b>INPP5B</b>             |                                         |
| COSV65959311              | Esophageal tumor                        |
| COSV65959639              | Breast tumor                            |
| COSV65959760              | Breast tumor                            |
| COSV65960118              | Pancreatic tumor                        |
| COSV65960733              | Liver tumor                             |
| COSV65960967              | Hematopoietic and lymphoid tissue tumor |
| COSV65961219              | Liver tumor                             |
| COSV65961269              | Hematopoietic and lymphoid tissue tumor |
| COSV65961279              | Ovarian tumor                           |
| COSV65961492              | Ovarian tumor                           |
| COSV65961588              | Breast tumor                            |
| COSV65961603              | Hematopoietic and lymphoid tissue tumor |
| COSV65961705              | Liver tumor                             |
| COSV65961718              | Liver tumor                             |
| COSV65961823              | Ovarian tumor                           |
| COSV65962214              | Liver tumor                             |
| COSV65962405              | Hematopoietic and lymphoid tissue tumor |
| COSV65962417              | Prostate tumor                          |
| COSV65962483              | Liver tumor                             |
| COSV65962514              | Liver tumor                             |
| COSV65962520              | Ovarian tumor                           |
| COSV65962976              | Ovarian tumor                           |
| COSV65963068              | Ovarian tumor                           |
| COSV65963313              | Prostate tumor                          |
| COSV65963339              | Kidney tumor                            |
| <b>DET1</b>               |                                         |
| COSV51550681              | Hematopoietic and lymphoid tissue tumor |

|                     |                                         |
|---------------------|-----------------------------------------|
| COSV51550823        | Upper aerodigestive tract tumor         |
| COSV51550973        | Esophageal tumor                        |
| COSV51551595        | Prostate tumor                          |
| COSV51551696        | Breast tumor                            |
| COSV51551865        | Liver tumor                             |
| COSV51551976        | Kidney tumor                            |
| COSV51551985        | Kidney tumor                            |
| COSV51552255        | Breast tumor                            |
| COSV51553355        | Hematopoietic and lymphoid tissue tumor |
| COSV51553727        | Central nervous system tumor            |
| <b>PSMA1</b>        |                                         |
| COSV67166382        | Breast tumor                            |
| COSV67166400        | Stomach tumor                           |
| COSV67166463        | Breast tumor                            |
| COSV67166513        | Prostate tumor                          |
| COSV67166536        | Liver tumor                             |
| COSV67166564        | Prostate tumor                          |
| COSV69859392        | Breast tumor                            |
| COSV69860027        | Breast tumor                            |
| COSV69860372        | Hematopoietic and lymphoid tissue tumor |
| COSV69860374        | Hematopoietic and lymphoid tissue tumor |
| COSV69860495        | Large intestine tumor                   |
| COSV69860859        | Hematopoietic and lymphoid tissue tumor |
| COSV69860862        | Hematopoietic and lymphoid tissue tumor |
| COSV69860943        | Hematopoietic and lymphoid tissue tumor |
| COSV69861018        | Hematopoietic and lymphoid tissue tumor |
| COSV69861108        | Esophageal tumor                        |
| COSV69861163        | Breast tumor                            |
| <b>MACROD2-ERV1</b> |                                         |
| COSV54063250        | Kidney tumor                            |

\*COSMIC database (<https://cancer.sanger.ac.uk/cosmic>)

**Table S11.** Transcription factors (TF) associated exclusively with ERVs, excluding all TFs shared by orthologs and paralogs annotated in equivalent structural sections.

| <i>INPP5B</i> | <i>DET1</i> | <i>PSMA1</i> | <i>USH2A</i> | <i>ERV1<br/>MACROD2</i> | <i>ERV2<br/>MACROD2</i> |
|---------------|-------------|--------------|--------------|-------------------------|-------------------------|
| A4            | AFF4        | AMH          | AR           | AGO1                    | AR                      |
| AR            | AGO2        | ASCL1        | BRD4         | AHR                     | BHLHE40                 |
| ASCL1         | AHR         | BMI1         | CEBPA        | AR                      | BRD2                    |
| BMI1          | AR          | CBFA2T2      | CEBPB        | ARID3A                  | CEBPB                   |
| BRD4          | ARID1A      | CBFA2T3      | CTCF         | ARNT                    | CREB1                   |
| BRD9          | ARNT        | CEBPA        | DUX4         | BATF                    | CTCF                    |

|        |         |         |         |        |         |
|--------|---------|---------|---------|--------|---------|
| CASZ1  | ASCL1   | CEBPB   | ELK3    | BATF3  | CUL4A   |
| CBX3   | ATF3    | CTCF    | ESR1    | BCL11A | DTL     |
| CBX5   | BMI1    | CUL4A   | HNF4A   | BCL6   | DUX4    |
| CEBPA  | BRD2    | DTL     | KLF11   | BMI1   | EP300   |
| CLOCK  | BRD3    | DUX4    | KLF4    | BRD2   | ESR1    |
| CTCF   | BRD4    | ERCC2   | KMT2A   | BRD4   | FOXA1   |
| CUL4A  | CAVIN1  | ESR1    | MYC     | CDK9   | FOXA2   |
| DCP1A  | CBFA2T3 | FOSB    | NFKB1   | CDX2   | GATA1   |
| DUX4   | CDK8    | FOXA2   | NUP98   | CEBPA  | GATA2   |
| EGR2   | CDK9    | GABPA   | PADI2   | CEBPB  | GATA3   |
| EGR3   | CEBPA   | GATA6   | PPARG   | CEBPG  | GATA4   |
| ELK3   | CEBPB   | GTF3C2  | RAD21   | CENPA  | JUND    |
| EP300  | CHD1    | HDAC2   | RELA    | CTCF   | KLF4    |
| ESR1   | CHD4    | HIF1A   | RING1   | DUX4   | MAFK    |
| ETS1   | CHD7    | IKZF1   | PHOX2B  | E2F1   | MBD4    |
| EZH2   | CREB1   | INO80   | RUNX1   | E2F8   | MCM7    |
| FANCD2 | CREB3   | IRF4    | STAT1   | EBF1   | MYC     |
| FOXA1  | CTCF    | JUN     | SUZ12   | EED    | MYOG    |
| FOXA2  | DDX20   | LDB1    | TAL1    | ELF1   | NEUROD1 |
| FOXO1  | DPF2    | LMNA    | TP63    | ELF3   | NF2L2   |
| GATA2  | E2F6    | MAX     | TRIM28  | EP300  | NFATC3  |
| HDAC1  | EED     | MAZ     | UPF1    | EPAS1  | NR3C1   |
| HDAC2  | ELF1    | MBD4    | YAP1    | ERG    | OTX2    |
| HIF1A  | EOMES   | MCM7    | ZNF585B | ESR1   | PGR     |
| HNF4A  | EP300   | MITF    | ZNF586  | ETS1   | PPARG   |
| IRF4   | ERCC2   | MYOD1   |         | FOXA1  | RAD21   |
| JUN    | ERCC3   | MYOG    |         | FOXA2  | SMAD2   |
| KLF4   | ERCC6   | NCOR1   |         | GATA2  | SMAD4   |
| KMT2A  | ERG     | NFE2    |         | GTF3C2 | SMARCA4 |
| MBD4   | ESR1    | NUP98   |         | HDAC1  | SMARCC1 |
| MBL2   | ETS1    | PEX2    |         | HIF1A  | SNAI2   |
| MCM7   | ETS2    | RAD21   |         | HMGA1  | SPI1    |
| MECP2  | ETV2    | SMARCA4 |         | HNF4A  | TAL1    |
| MSC    | EZH2    | SOX17   |         | HOXB13 | TLE3    |
| MTOR   | FEZF1   | SPI1    |         | HOXC9  | TRIM28  |
| MYC    | FLI1    | SSRP1   |         | HSF1   | WT1     |
| MYCN   | FOS     | TAL1    |         | IKZF1  | ZBTB7A  |
| MYOD1  | FOSB    | TBP     |         | IRF4   |         |
| MYOG   | FOSL1   | TBX21   |         | KDM6A  |         |
| NCOR2  | FOSL2   | TRIM28  |         | KLF4   |         |
| NFKB1  | FOXA1   | UPF1    |         | KMT2A  |         |
| NFKBIA | FOXA2   | WT1     |         | LMNA   |         |
| NR3C1  | FO XK2  | ZNF316  |         | LMNB1  |         |
| PADI2  | FOXO1   | ZNF600  |         | MBD4   |         |
| PALB2  | GATA1   |         |         | MBL2   |         |
| PARP1  | GATA2   |         |         | MECP2  |         |

|         |         |  |  |         |  |
|---------|---------|--|--|---------|--|
| PCBP2   | GATA3   |  |  | MEF2B   |  |
| POU5F1  | GATA4   |  |  | MLLT1   |  |
| PPARG   | GATA6   |  |  | MXD3    |  |
| RAD21   | GATAD2A |  |  | MYC     |  |
| RBBP4   | GATAD2B |  |  | MYCN    |  |
| RELA    | GLIS1   |  |  | MYOD1   |  |
| RING1   | GTF2A2  |  |  | MYOG    |  |
| RNF2    | GTF3C2  |  |  | NFATC3  |  |
| RUNX1   | HDAC1   |  |  | NFKB1   |  |
| SETDB1  | HDAC2   |  |  | NFKB2   |  |
| SIRT1   | HDGFL2  |  |  | NIPBL   |  |
| SOX17   | HEY1    |  |  | NOTCH1  |  |
| SP5     | HINFP   |  |  | PAX5    |  |
| SPI1    | HMBOX1  |  |  | PBX2    |  |
| STAT1   | HOXB13  |  |  | PBX3    |  |
| SUMO2   | HSF1    |  |  | PGR     |  |
| SUPT5H  | ID3     |  |  | PKNOX1  |  |
| SUZ12   | IKZF1   |  |  | PPARG   |  |
| TCF7L2  | IKZF3   |  |  | PTBP1   |  |
| TEAD4   | ILK     |  |  | RAD21   |  |
| TFAP2C  | INTS11  |  |  | RBBP5   |  |
| TP63    | IRF1    |  |  | RELA    |  |
| TRIM24  | IRF9    |  |  | RELB    |  |
| TRIM28  | JUN     |  |  | REST    |  |
| TRPS1   | JUNB    |  |  | RING1   |  |
| WT1     | JUND    |  |  | RUNX3   |  |
| ZBTB17  | KDM1A   |  |  | SAP130  |  |
| ZNF263  | KDM5B   |  |  | SATB1   |  |
| ZNF280A | KLF4    |  |  | SIN3A   |  |
| ZNF467  | KMT2A   |  |  | SKIL    |  |
| ZNF600  | KMT2B   |  |  | SMC1A   |  |
| ZNF83   | KMT2C   |  |  | SOX8    |  |
| ZSCAN29 | LMNA    |  |  | SPI1    |  |
|         | MAX     |  |  | SRF     |  |
|         | MAZ     |  |  | SSRP1   |  |
|         | MBD4    |  |  | STAG1   |  |
|         | MECOM   |  |  | STAT3   |  |
|         | MED12   |  |  | SUMO2   |  |
|         | MEF2A   |  |  | SUZ12   |  |
|         | MEF2B   |  |  | TAL1    |  |
|         | MEF2D   |  |  | TP53BP1 |  |
|         | MEIS2   |  |  | TP63    |  |
|         | MITF    |  |  | TRIM22  |  |
|         | MNT     |  |  | TRIM28  |  |
|         | MYC     |  |  | TRPS1   |  |
|         | MYCN    |  |  | UPF1    |  |

|  |         |  |  |         |  |
|--|---------|--|--|---------|--|
|  | MYNN    |  |  | WT1     |  |
|  | MYOD1   |  |  | XBP1    |  |
|  | MYOG    |  |  | YY1     |  |
|  | NANOG   |  |  | ZBTB17  |  |
|  | NCOR1   |  |  | ZBTB7A  |  |
|  | NEUROD1 |  |  | ZFX     |  |
|  | NFE2    |  |  | ZSCAN5A |  |
|  | NFRKB   |  |  |         |  |
|  | NKX2-1  |  |  |         |  |
|  | NR2F1   |  |  |         |  |
|  | NR2F2   |  |  |         |  |
|  | NR3C1   |  |  |         |  |
|  | NR4A1   |  |  |         |  |
|  | NRC1    |  |  |         |  |
|  | NSD2    |  |  |         |  |
|  | NUP98   |  |  |         |  |
|  | ORC2    |  |  |         |  |
|  | OSR2    |  |  |         |  |
|  | OTX2    |  |  |         |  |
|  | PADI2   |  |  |         |  |
|  | PDX1    |  |  |         |  |
|  | PGR     |  |  |         |  |
|  | PHF8    |  |  |         |  |
|  | PML     |  |  |         |  |
|  | POU5F1  |  |  |         |  |
|  | PPARG   |  |  |         |  |
|  | PRDM9   |  |  |         |  |
|  | PRDMI4  |  |  |         |  |
|  | PTTG1   |  |  |         |  |
|  | PYGO2   |  |  |         |  |
|  | RAD21   |  |  |         |  |
|  | RBBP5   |  |  |         |  |
|  | RBM22   |  |  |         |  |
|  | RBM39   |  |  |         |  |
|  | RCOR1   |  |  |         |  |
|  | RELA    |  |  |         |  |
|  | RFX1    |  |  |         |  |
|  | RING1   |  |  |         |  |
|  | RMF2    |  |  |         |  |
|  | RNF2    |  |  |         |  |
|  | RUNX1   |  |  |         |  |
|  | RXRA    |  |  |         |  |
|  | SALL3   |  |  |         |  |
|  | SCRT1   |  |  |         |  |
|  | SFPQ    |  |  |         |  |
|  | SIN3A   |  |  |         |  |

|  |         |  |  |  |  |
|--|---------|--|--|--|--|
|  | SMAD1   |  |  |  |  |
|  | SMAD2   |  |  |  |  |
|  | SMARCA4 |  |  |  |  |
|  | SMARCB1 |  |  |  |  |
|  | SNAI2   |  |  |  |  |
|  | SOX17   |  |  |  |  |
|  | SOX2    |  |  |  |  |
|  | SOX8    |  |  |  |  |
|  | SP1     |  |  |  |  |
|  | SPF2    |  |  |  |  |
|  | SPI1    |  |  |  |  |
|  | SPIB    |  |  |  |  |
|  | SRF     |  |  |  |  |
|  | SRSF3   |  |  |  |  |
|  | SS18    |  |  |  |  |
|  | SSRP1   |  |  |  |  |
|  | STAT5A  |  |  |  |  |
|  | STAT5B  |  |  |  |  |
|  | SUMO2   |  |  |  |  |
|  | SUPT5H  |  |  |  |  |
|  | SUPT6H  |  |  |  |  |
|  | TAF1    |  |  |  |  |
|  | TAL1    |  |  |  |  |
|  | TBL1XR1 |  |  |  |  |
|  | TBP     |  |  |  |  |
|  | TCF12   |  |  |  |  |
|  | TCF4    |  |  |  |  |
|  | TEAD4   |  |  |  |  |
|  | TET2    |  |  |  |  |
|  | TFAP2C  |  |  |  |  |
|  | TP53    |  |  |  |  |
|  | TP63    |  |  |  |  |
|  | TRIM28  |  |  |  |  |
|  | TRPS1   |  |  |  |  |
|  | VEZF1   |  |  |  |  |
|  | WT1     |  |  |  |  |
|  | XRCC5   |  |  |  |  |
|  | YAP1    |  |  |  |  |
|  | YY1     |  |  |  |  |
|  | ZBTB40  |  |  |  |  |
|  | ZBTB48  |  |  |  |  |
|  | ZBTB6   |  |  |  |  |
|  | ZBTB7A  |  |  |  |  |
|  | ZFP91   |  |  |  |  |
|  | ZFX     |  |  |  |  |
|  | ZNF574  |  |  |  |  |

|  |         |  |  |  |  |
|--|---------|--|--|--|--|
|  | ZNF143  |  |  |  |  |
|  | ZNF316  |  |  |  |  |
|  | ZNF329  |  |  |  |  |
|  | ZNF384  |  |  |  |  |
|  | ZNF395  |  |  |  |  |
|  | ZNF639  |  |  |  |  |
|  | ZNF652  |  |  |  |  |
|  | ZNF687  |  |  |  |  |
|  | ZNF740  |  |  |  |  |
|  | ZNF766  |  |  |  |  |
|  | ZNF816  |  |  |  |  |
|  | ZSCAN5A |  |  |  |  |
|  | ZSCAN16 |  |  |  |  |

**Table S12.** Transcription factor enrichment analysis in structural equivalent sections to paralog genes to ERV candidates.

| <b>Gene name</b>       | <b>N° of unique transcription factors in the equivalent area of the ERV</b> | <b>Pathways</b>                         | <b>Transcription factors involved in the Pathway</b> | <b>Benjamini*</b> |
|------------------------|-----------------------------------------------------------------------------|-----------------------------------------|------------------------------------------------------|-------------------|
| <b>INPP5B paralogs</b> |                                                                             |                                         |                                                      |                   |
| SH2D1A                 | 9                                                                           | Th1 and Th2 cell differentiation        | 2                                                    | 1.00E+00          |
|                        |                                                                             | Progesterone-mediated oocyte maturation | 2                                                    | 1.00E+00          |
|                        |                                                                             | Oocyte meiosis                          | 2                                                    | 1.00E+00          |
|                        |                                                                             | Epstein-Barr virus infection            | 2                                                    | 1.00E+00          |
| INPP5D                 | 133                                                                         | Transcriptional misregulation in cancer | 17                                                   | 1.20E-09          |
|                        |                                                                             | Chronic myeloid leukemia                | 8                                                    | 2.30E-04          |
|                        |                                                                             | Th17 cell differentiation               | 9                                                    | 2.30E-04          |
|                        |                                                                             | Viral carcinogenesis                    | 11                                                   | 4.40E-04          |
|                        |                                                                             | Cell cycle                              | 9                                                    | 4.40E-04          |
|                        |                                                                             | Human T-cell leukemia virus 1 infection | 11                                                   | 6.10E-04          |
|                        |                                                                             | Pathways in cancer                      | 16                                                   | 1.20E-03          |
|                        |                                                                             | Hepatitis B                             | 9                                                    | 1.70E-03          |



|  |  |                                                          |   |          |
|--|--|----------------------------------------------------------|---|----------|
|  |  | Th1 and Th2 cell differentiation                         | 7 | 2.60E-03 |
|  |  | AGE-RAGE signaling pathway in diabetic complications     | 6 | 2.80E-02 |
|  |  | Parathyroid hormone synthesis, secretion and action      | 6 | 3.10E-02 |
|  |  | Inflammatory bowel disease                               | 5 | 3.10E-02 |
|  |  | Chemical carcinogenesis - receptor activation            | 8 | 3.10E-02 |
|  |  | Acute myeloid leukemia                                   | 5 | 3.10E-02 |
|  |  | Non-small cell lung cancer                               | 5 | 3.80E-02 |
|  |  | Pancreatic cancer                                        | 5 | 4.30E-02 |
|  |  | Epstein-Barr virus infection                             | 7 | 7.90E-02 |
|  |  | Prostate cancer                                          | 5 | 8.70E-02 |
|  |  | Endocrine resistance                                     | 5 | 8.70E-02 |
|  |  | Cellular senescence                                      | 6 | 9.30E-02 |
|  |  | Hepatocellular carcinoma                                 | 6 | 1.20E-01 |
|  |  | Wnt signaling pathway                                    | 6 | 1.20E-01 |
|  |  | Growth hormone synthesis, secretion, and action          | 5 | 1.40E-01 |
|  |  | FoxO signaling pathway                                   | 5 | 1.80E-01 |
|  |  | Measles                                                  | 5 | 2.10E-01 |
|  |  | Signaling pathways regulating pluripotency of stem cells | 5 | 2.20E-01 |
|  |  | Gastric cancer                                           | 5 | 2.40E-01 |

|        |     |                                                      |    |          |
|--------|-----|------------------------------------------------------|----|----------|
|        |     | Small cell lung cancer                               | 4  | 2.50E-01 |
|        |     | Cushing syndrome                                     | 5  | 2.50E-01 |
|        |     | Human cytomegalovirus infection                      | 6  | 2.50E-01 |
|        |     | Thyroid hormone signaling pathway                    | 4  | 4.30E-01 |
|        |     | Kaposi sarcoma-associated herpes virus infection     | 5  | 4.30E-01 |
|        |     | Notch signaling pathway                              | 3  | 4.30E-01 |
| SH2D1B | 10  | Progesterone-mediated oocyte maturation              | 2  | 5.20E-01 |
|        |     | Cell cycle                                           | 2  | 5.20E-01 |
|        |     | Oocyte meiosis                                       | 2  | 5.20E-01 |
|        |     | Gastric cancer                                       | 2  | 5.20E-01 |
|        |     | Cellular senescence                                  | 2  | 5.20E-01 |
|        |     | Hepatocellular carcinoma                             | 2  | 5.20E-01 |
| INPP5F | 109 | Transcriptional misregulation in cancer              | 15 | 3.40E-09 |
|        |     | Non-small cell lung cancer                           | 4  | 4.50E-01 |
|        |     | Chemical carcinogenesis - receptor activation        | 6  | 4.50E-01 |
|        |     | Human T-cell leukemia virus 1 infection              | 6  | 4.50E-01 |
|        |     | Breast cancer                                        | 5  | 4.50E-01 |
|        |     | Thermogenesis                                        | 6  | 4.50E-01 |
|        |     | Hepatocellular carcinoma                             | 5  | 5.20E-01 |
|        |     | Parathyroid hormone synthesis, secretion, and action | 4  | 5.80E-01 |
|        |     | Viral carcinogenesis                                 | 5  | 6.60E-01 |

|                       |    |                                                  |    |          |
|-----------------------|----|--------------------------------------------------|----|----------|
|                       |    | Herpes simplex virus 1 infection                 | 8  | 6.60E-01 |
|                       |    | Estrogen signaling pathway                       | 4  | 8.10E-01 |
|                       |    | Spliceosome                                      | 4  | 8.10E-01 |
|                       |    | Mitophagy - animal                               | 3  | 8.10E-01 |
|                       |    | Hippo signaling pathway                          | 4  | 8.10E-01 |
|                       |    | Chronic myeloid leukemia                         | 3  | 8.10E-01 |
|                       |    | Hepatitis B                                      | 4  | 8.10E-01 |
| INPP5K                | 4  | -                                                | -  | -        |
| <b>PSMA1 paralogs</b> |    |                                                  |    |          |
| PSMA8                 | 61 | Herpes simplex virus 1 infection                 | 18 | 6.40E-13 |
| PSMB1                 | 35 | Herpes simplex virus 1 infection                 | 13 | 3.80E-11 |
| PSMA5                 | 64 | Herpes simplex virus 1 infection                 | 15 | 1.70E-09 |
|                       |    | Maturity onset diabetes of the young             | 3  | 3.70E-02 |
| PSMB7                 | 43 | Herpes simplex virus 1 infection                 | 13 | 6.00E-09 |
|                       |    | Transcriptional misregulation in cancer          | 3  | 1.00E+00 |
| PSMB3                 | 5  | -                                                | -  | -        |
| <b>USH2A paralog</b>  |    |                                                  |    |          |
| ATRNL1                | 42 | Breast cancer                                    | 6  | 9.50E-03 |
|                       |    | Chemical carcinogenesis-receptor activation      | 6  | 2.60E-02 |
|                       |    | Pathways in cancer                               | 8  | 3.70E-02 |
|                       |    | Kaposi sarcoma-associated herpes virus infection | 5  | 7.60E-02 |
|                       |    | Maturity onset diabetes of the young             | 3  | 7.60E-02 |
|                       |    | Th17 cell differentiation                        | 4  | 8.30E-02 |
|                       |    |                                                  |    |          |

|                           |   |                                                 |   |          |
|---------------------------|---|-------------------------------------------------|---|----------|
|                           |   | Human T-cell leukemia virus 1 infection         | 5 | 8.30E-02 |
|                           |   | Hepatitis B                                     | 4 | 2.20E-01 |
|                           |   | Renal cell carcinoma                            | 3 | 2.80E-01 |
|                           |   | ErbB signaling pathway                          | 3 | 3.70E-01 |
|                           |   | Th1 and Th2 cell differentiation                | 3 | 3.70E-01 |
|                           |   | Prostate cancer                                 | 3 | 3.70E-01 |
|                           |   | Endocrine resistance                            | 3 | 3.70E-01 |
|                           |   | HIF-1 signaling pathway                         | 3 | 4.20E-01 |
|                           |   | Growth hormone synthesis, secretion, and action | 3 | 4.40E-01 |
|                           |   | Thyroid hormone signaling pathway               | 3 | 4.40E-01 |
|                           |   | Estrogen signaling pathway                      | 3 | 5.20E-01 |
|                           |   | Human papilloma virus infection                 | 4 | 5.90E-01 |
|                           |   | JAK-STAT signaling pathway                      | 3 | 6.20E-01 |
|                           |   | Hepatocellular carcinoma                        | 3 | 6.30E-01 |
| <b>MACROD2 paralog</b>    |   |                                                 |   |          |
| MACROD1 (ERV1-equivalent) | 2 | Necroptosis                                     | 2 | 3.50E-01 |
| MACROD1 (ERV2-equivalent) | 5 | Transcriptional misregulation in cancer         | 2 | 1.00E+00 |

\*Adjusted p-values by using the linear step-up method by Benjamini and Hochberg

**Table S13.** Cosmic variants identified within sections with high expression levels in brain tissues.

| <b>Gen associated</b> | <b>Cosmic variant ID</b> | <b>Phenotype</b>               |
|-----------------------|--------------------------|--------------------------------|
| INPP5B                | COSV65961705             | Liver tumor                    |
| INPP5B                | COSV65961588             | Breast tumor                   |
| TTLL5                 | COSV54041222             | Biliary tract tumor            |
| CENPC                 | COSV56625135             | Central nervous system tumor   |
| KLHL24                | COSV54428449             | Large intestine tumor          |
| POLDIP3               | COSV52808748             | Breast tumor; Esophageal tumor |
| POLDIP3               | COSV52808459             | Breast tumor                   |
| POLDIP3               | COSV52808465             | Breast tumor                   |

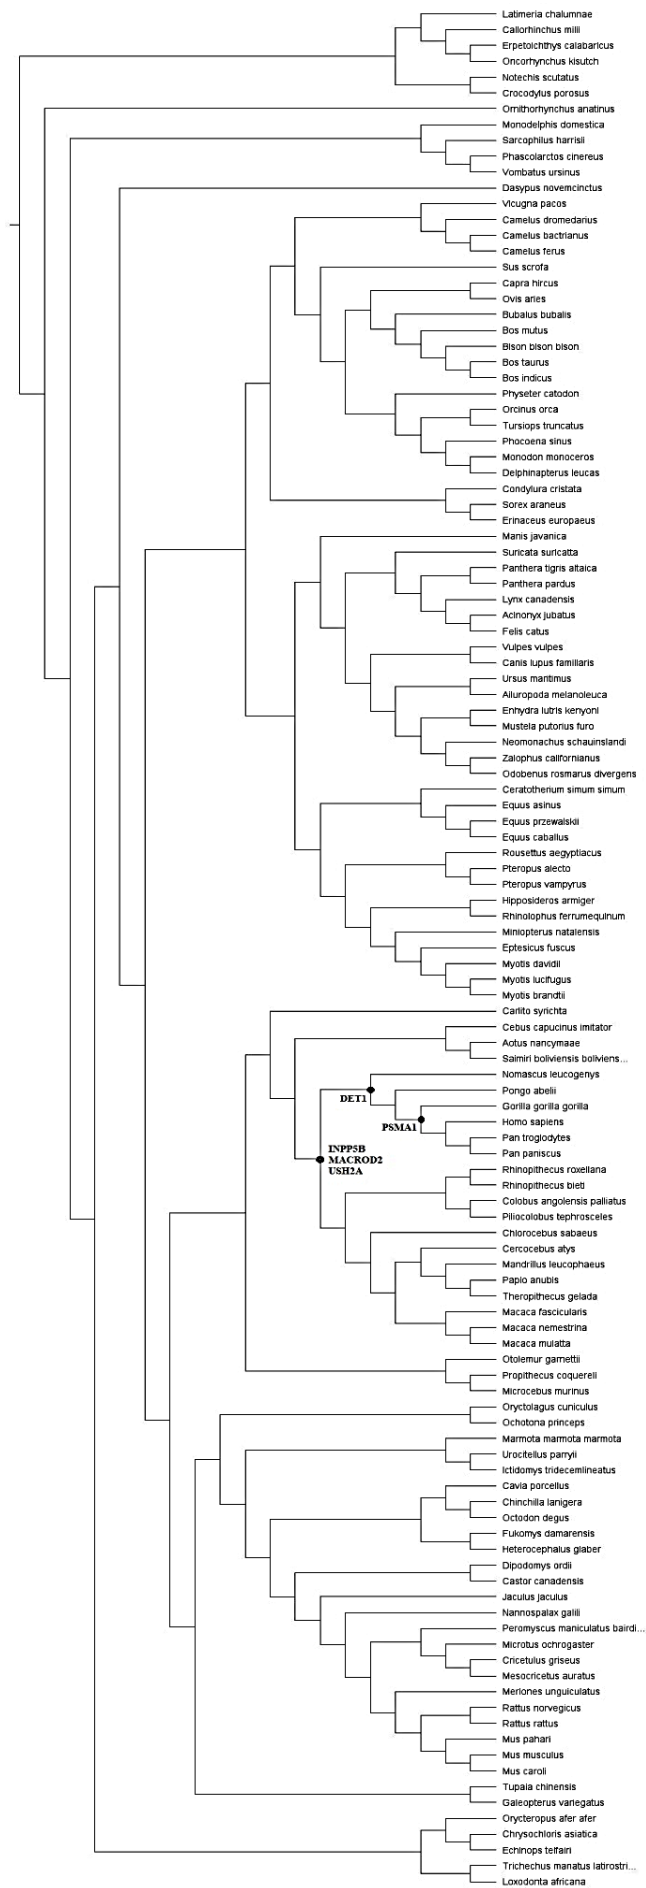

**Fig S1.** Mammal species tree with the location of the minimum common ancestor where the retrovirus infection occurred for the genes analyzed in this work.

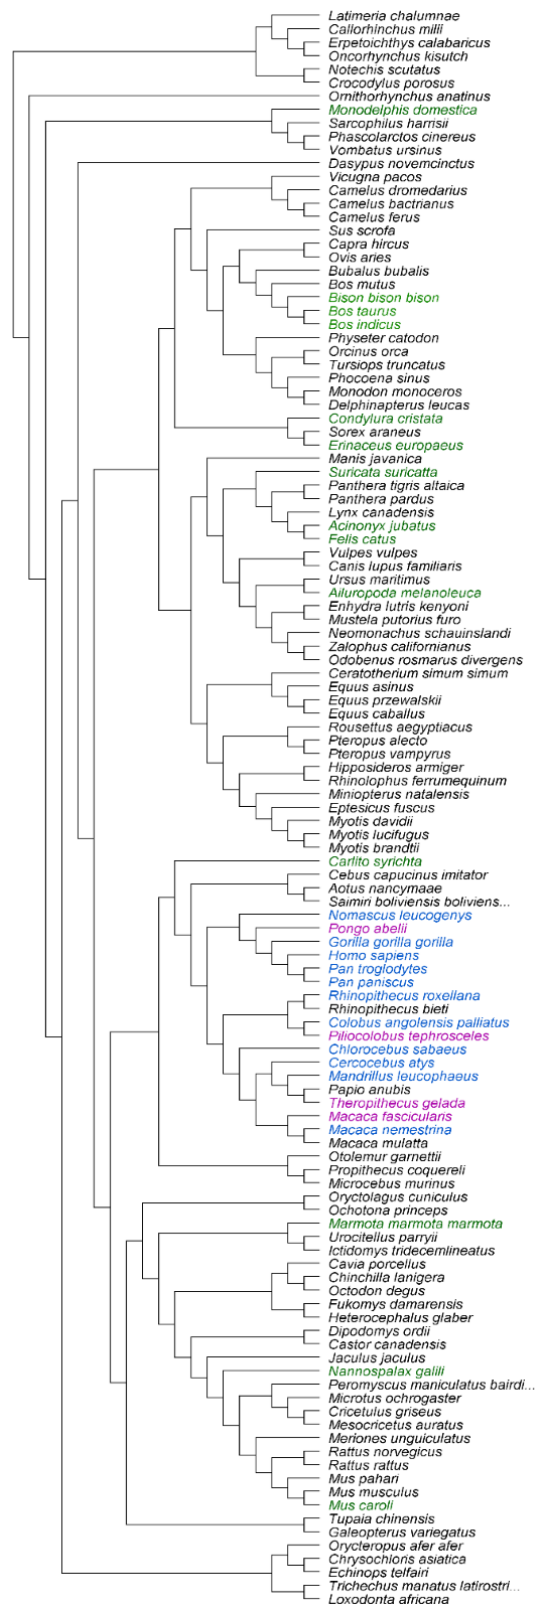

**Fig S2.** Mammal species tree with the location of the minimum common ancestor where the retrovirus infection occurred for the *INPP5B* gene. Blue represents the species where ERVs were detected with both RetroTector and BLASTN, purple for species detected only by alignment with BLASTN, and green for species detected by RetroTector only.

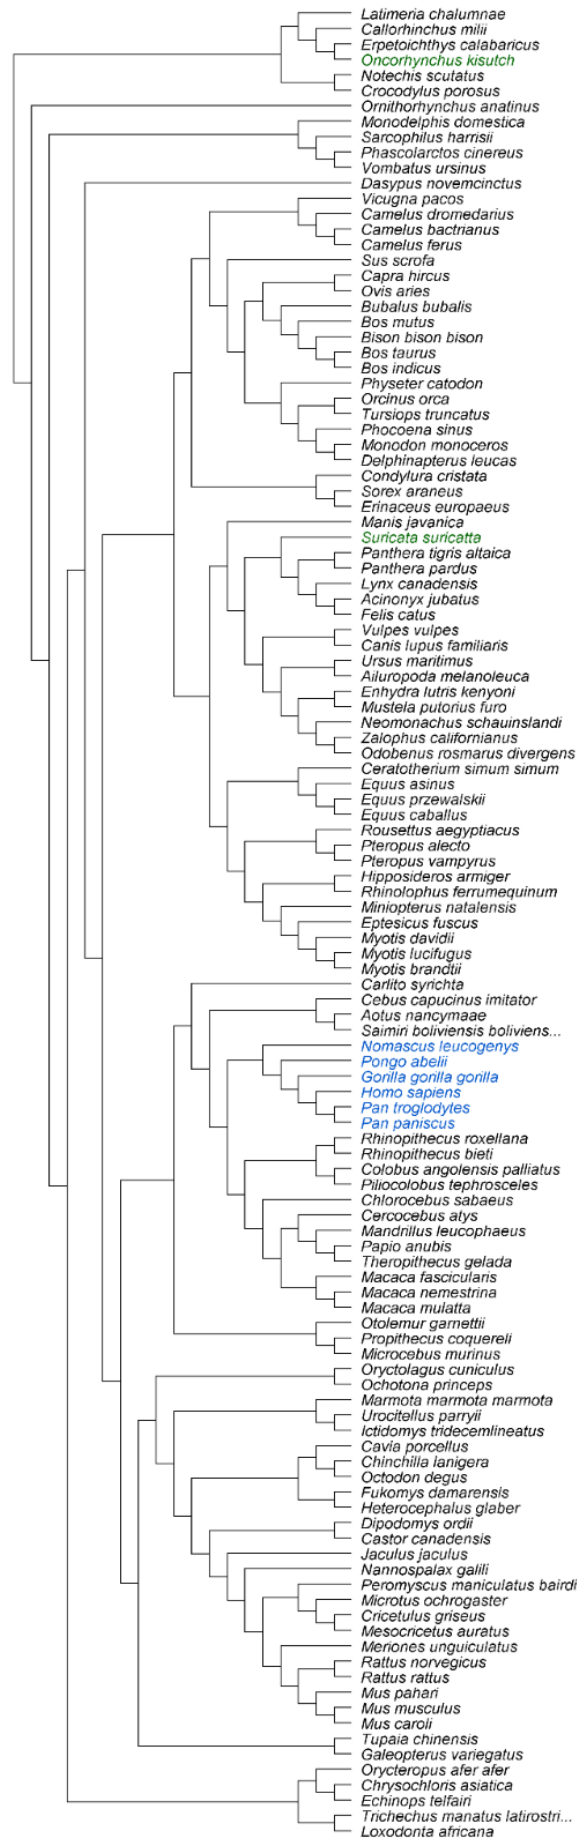

**Fig S3.** Mammal species tree with the location of the minimum common ancestor where the retrovirus infection occurred for the *DETI* gene. Blue represents the species where ERVs were



detected with both RetroTector and BLASTN, purple for species detected only by alignment with BLASTN, and green for species detected by RetroTector only.

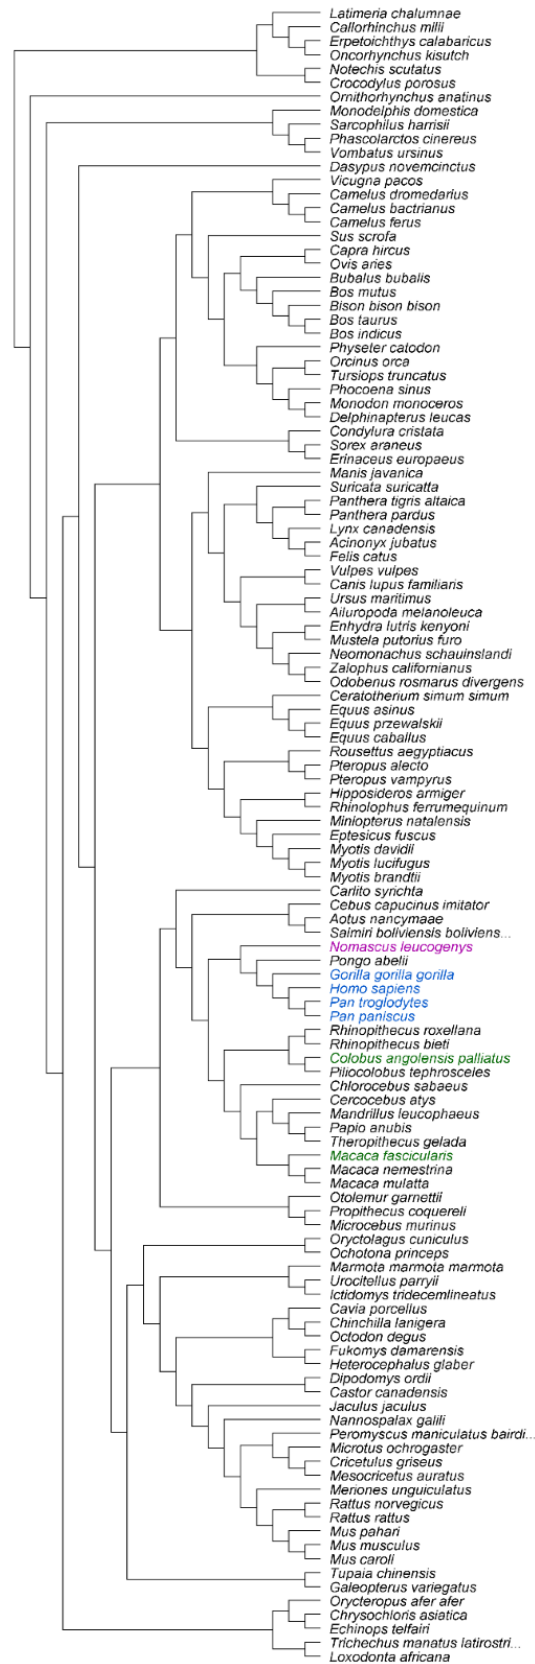

**Fig S4.** Mammal species tree with the location of the minimum common ancestor where the retrovirus infection occurred for the PSMA1 gene. Blue represents the species where ERVs were detected with both RetroTector and BLASTN, purple for species detected only by alignment with BLASTN, and green for species detected by RetroTector only.

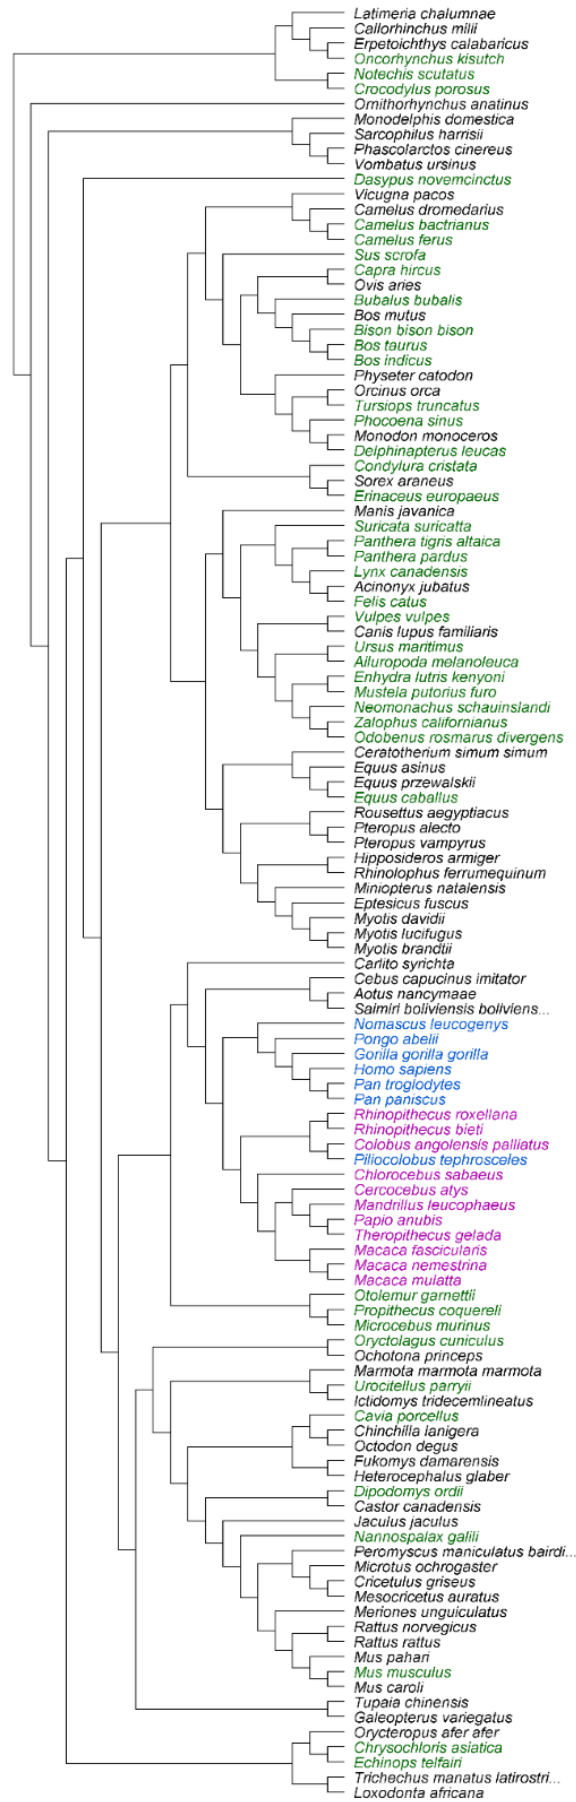

**Fig S5.** Mammal species tree with the location of the minimum common ancestor where the retrovirus infection occurred for the *USH2A* gene. Blue represents the species where ERVs

were detected with both RetroTector and BLASTN, purple for species detected only by alignment with BLASTN, and green for species detected by RetroTector only.

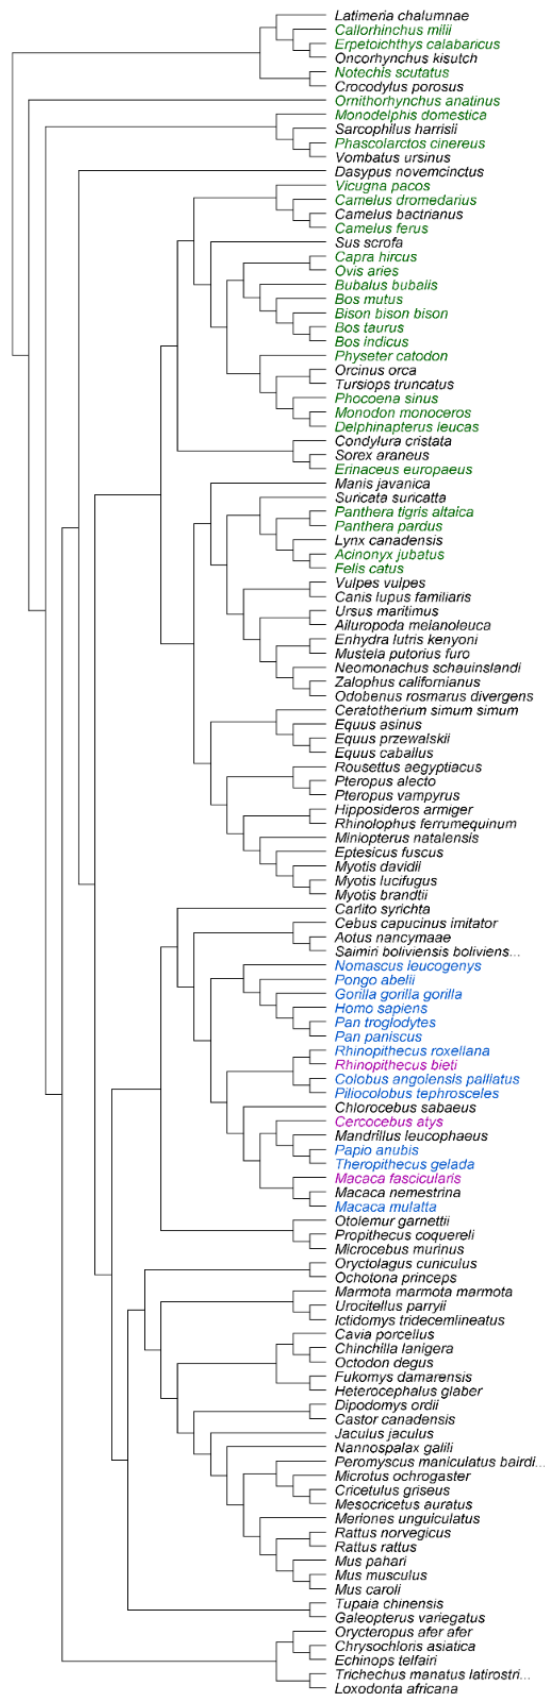

**Fig S6.** Mammal species tree with the location of the minimum common ancestor where the retrovirus infection occurred for the *MACROD2* gene. Blue represents the species where ERVs were detected with both RetroTector and BLASTN, purple for species detected only by alignment with BLASTN, and green for species detected by RetroTector only.
