# Supplementary material for: Evolutionary analysis of endogenous intronic retroviruses in primates reveals an enrichment in transcription binding sites associated with key regulatory processes
Source: PeerJ journal article supplement (doi:10.7717/peerj.14431), 2022-12-22

**Supplementary file 2.** Expression of the putative lncRNA inside human gene introns and their annotation by RepeatMasker (data extracted from UCSC browser). Brain hippocampus expression was used as brain tissues reference.

### TLL5

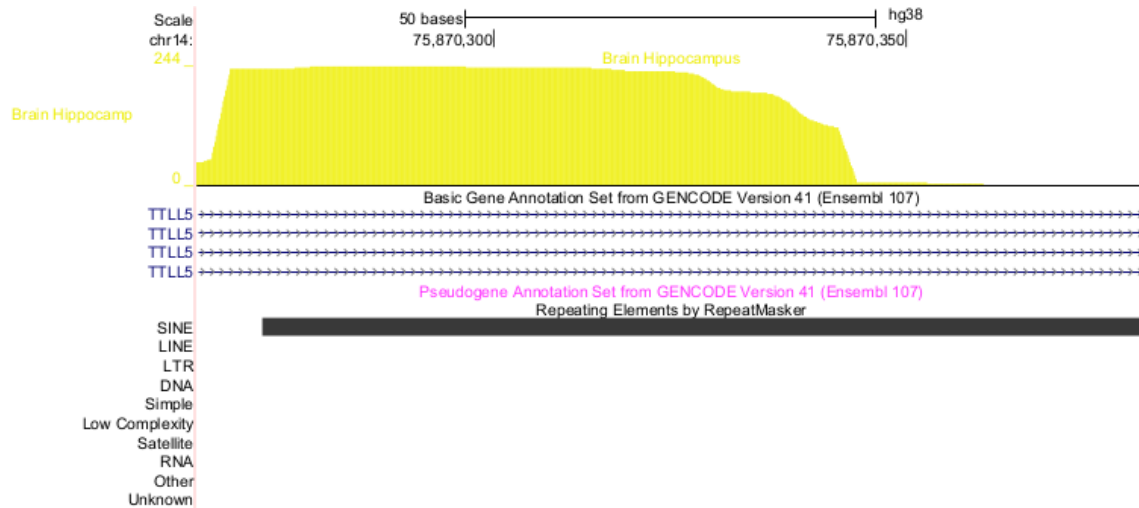

### CENPC

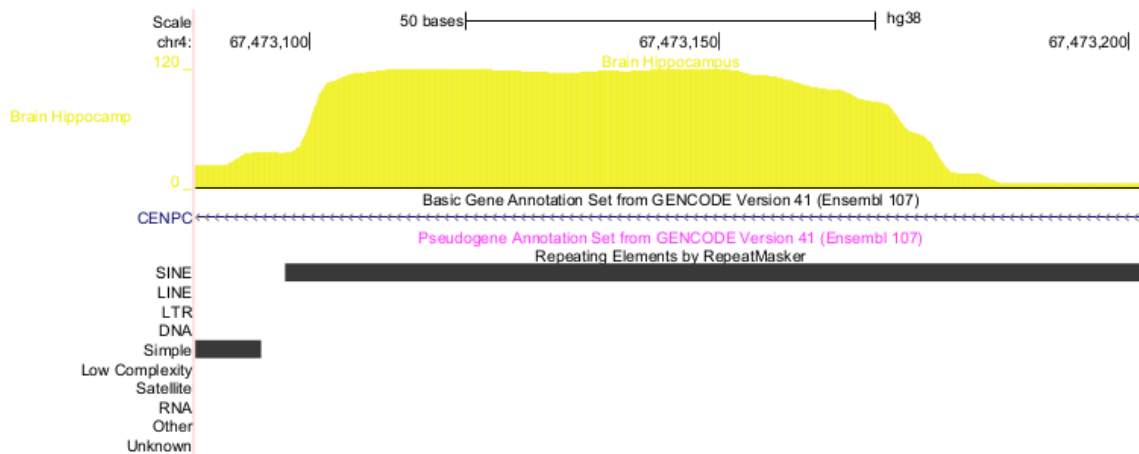

### KLHL24

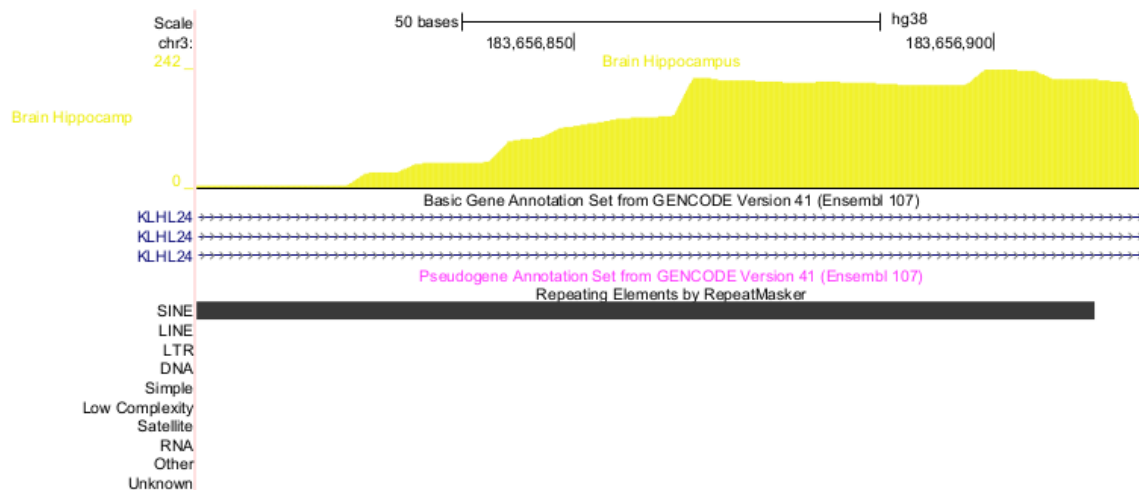

### DPYSL2

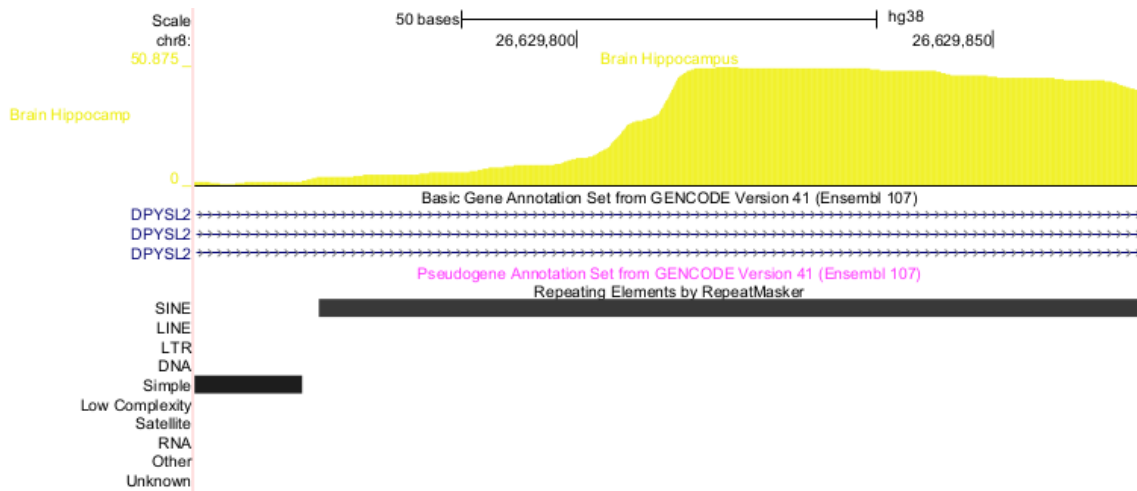

### PICALM

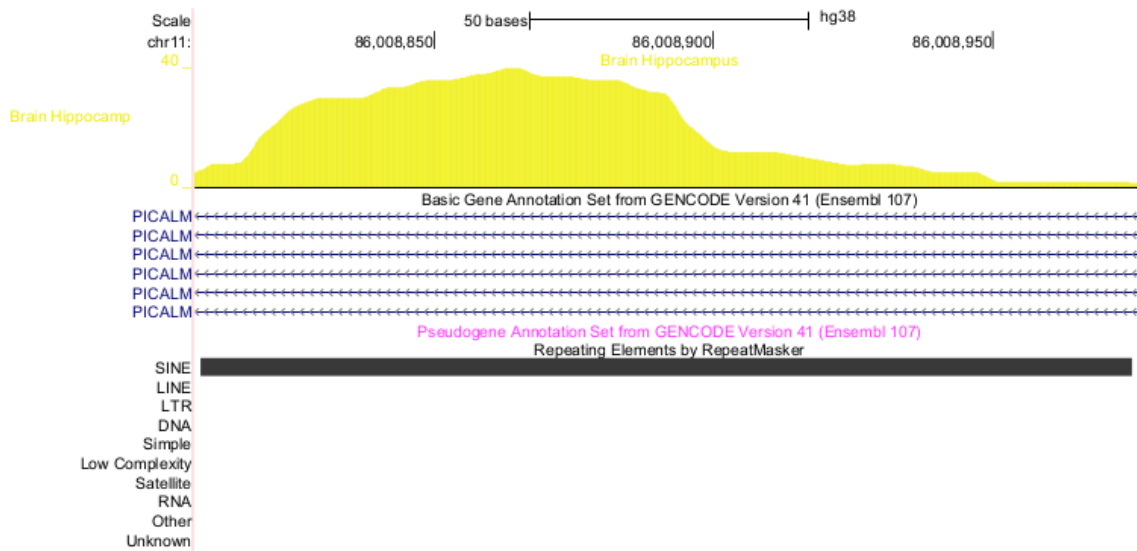

### PVT1

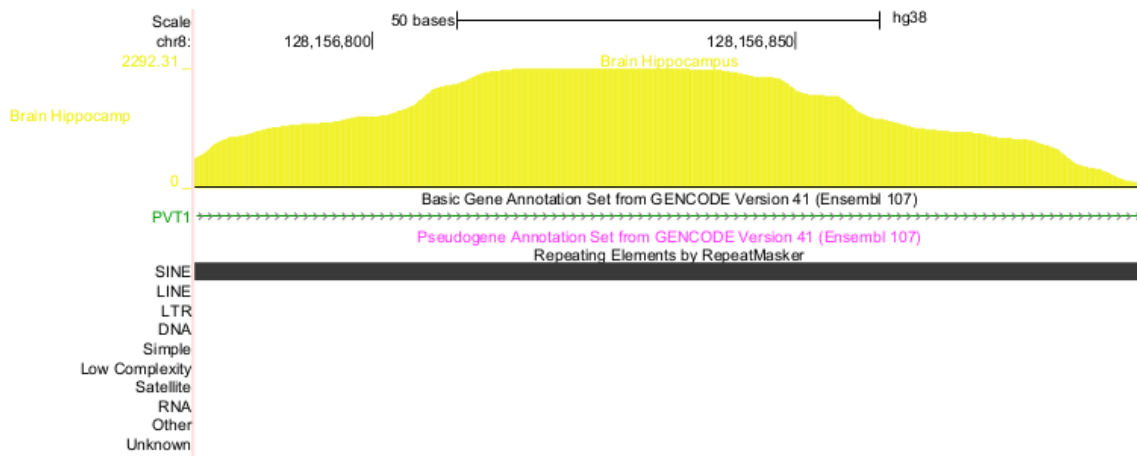

### EPCAM-DT

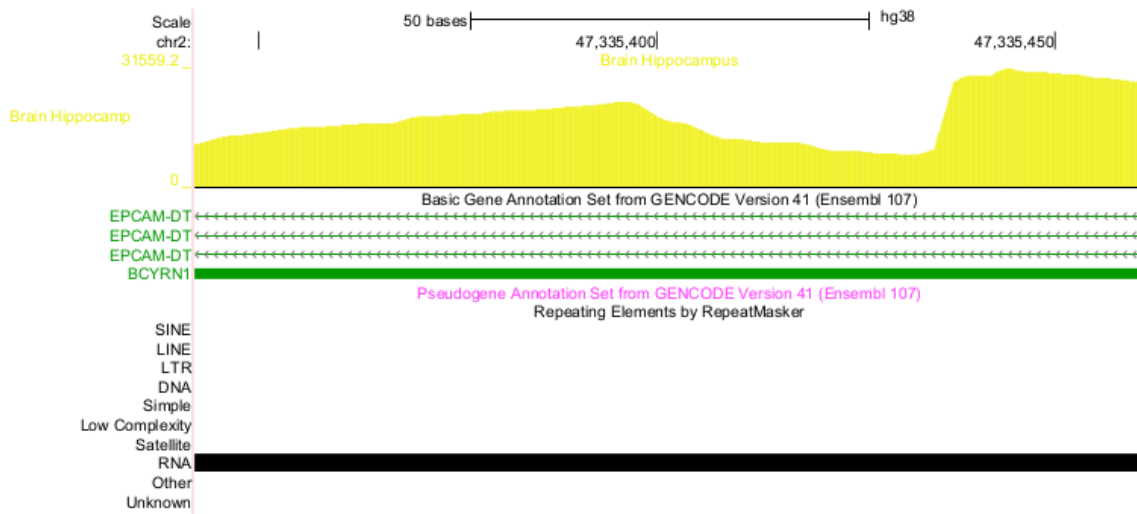

### MEF2C-AS1

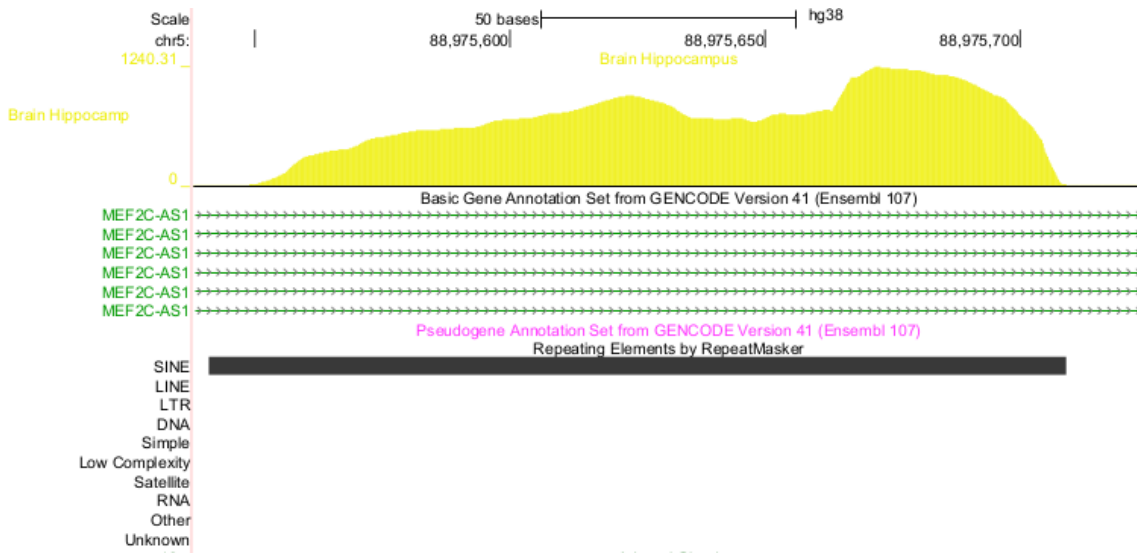

### POLDIP3

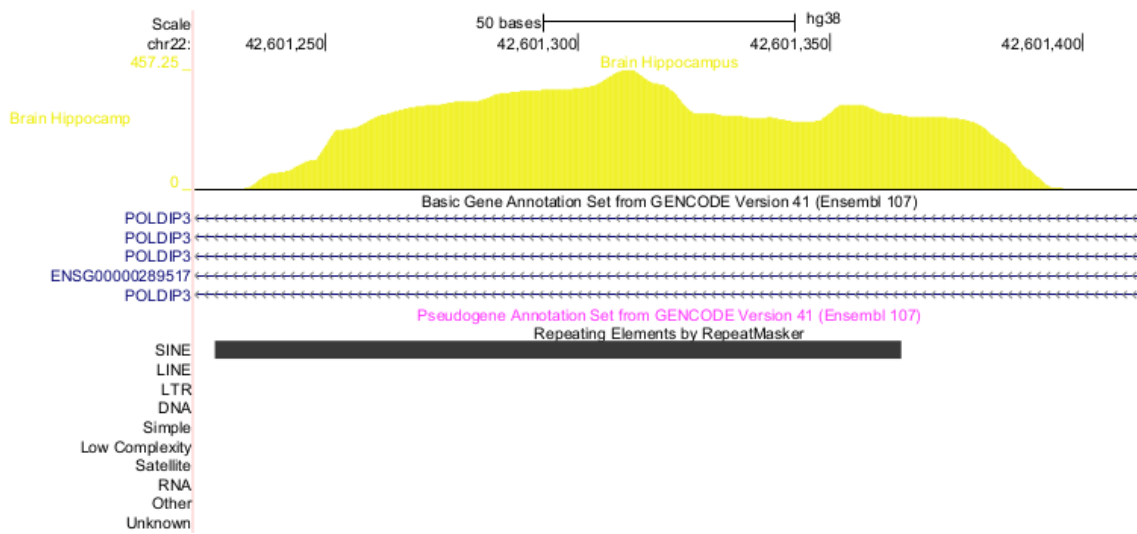

Supplement: Supplementary_file_2.pdf [file Supplementary_file_2.pdf]
