# Supplementary material for: Evolutionary analysis of endogenous intronic retroviruses in primates reveals an enrichment in transcription binding sites associated with key regulatory processes
Source: PeerJ journal article supplement (doi:10.7717/peerj.14431), 2022-12-22

**Supplementary file 3.** ERV expression in several tissues. Data visualized in UCSC genome browser (<http://genome.ucsc.edu>) using the GTEx portal data (<https://gtexportal.org/>)

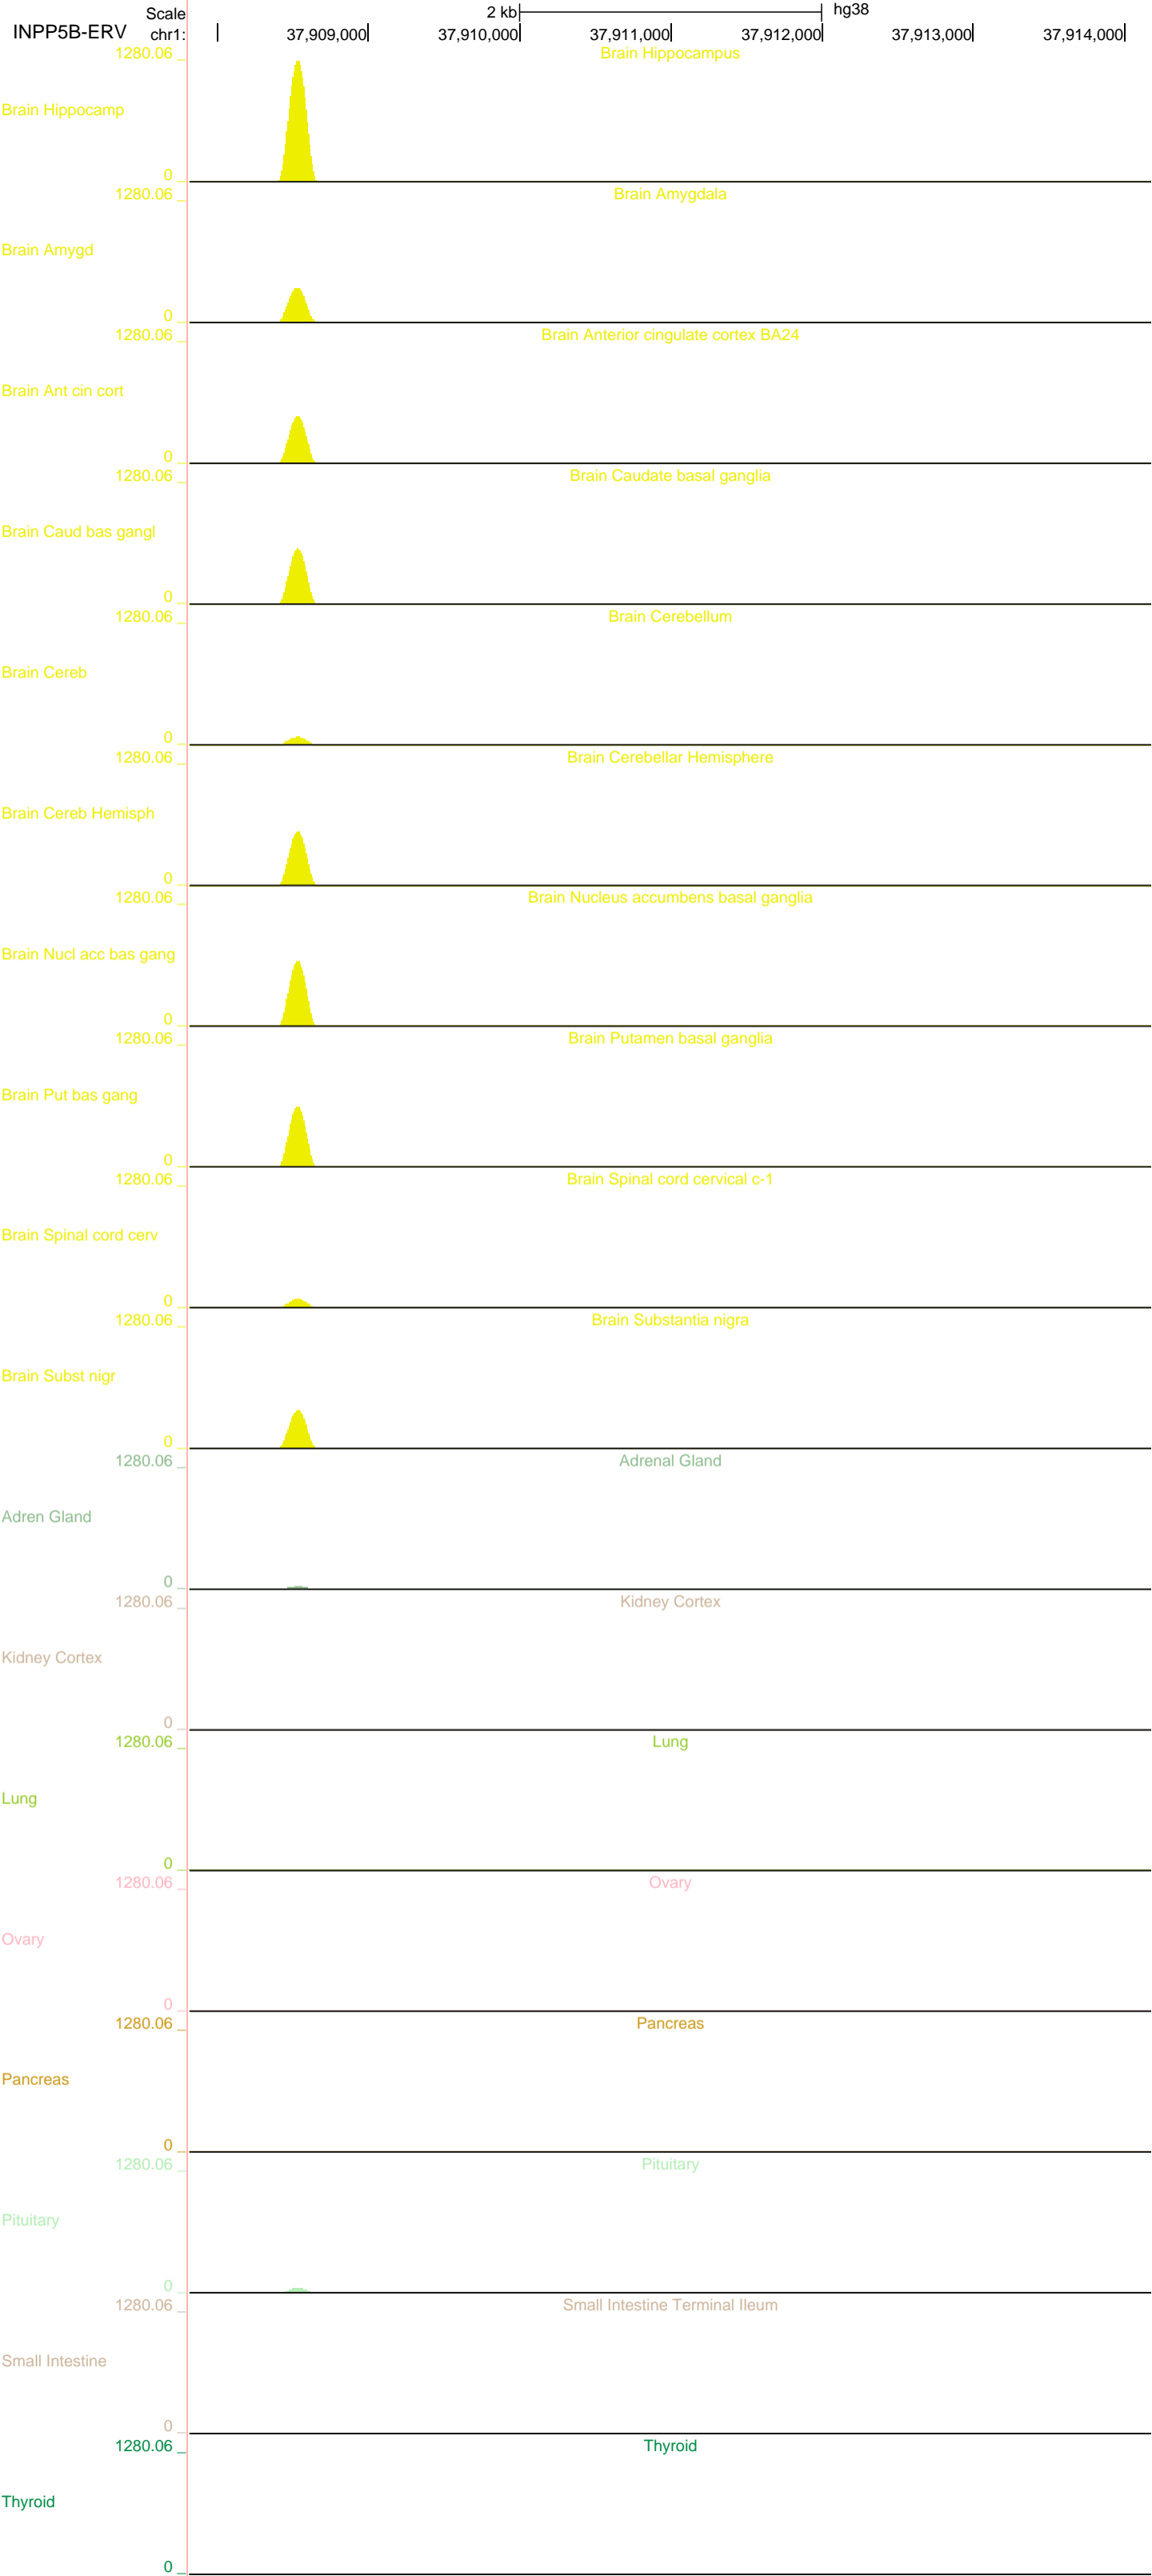

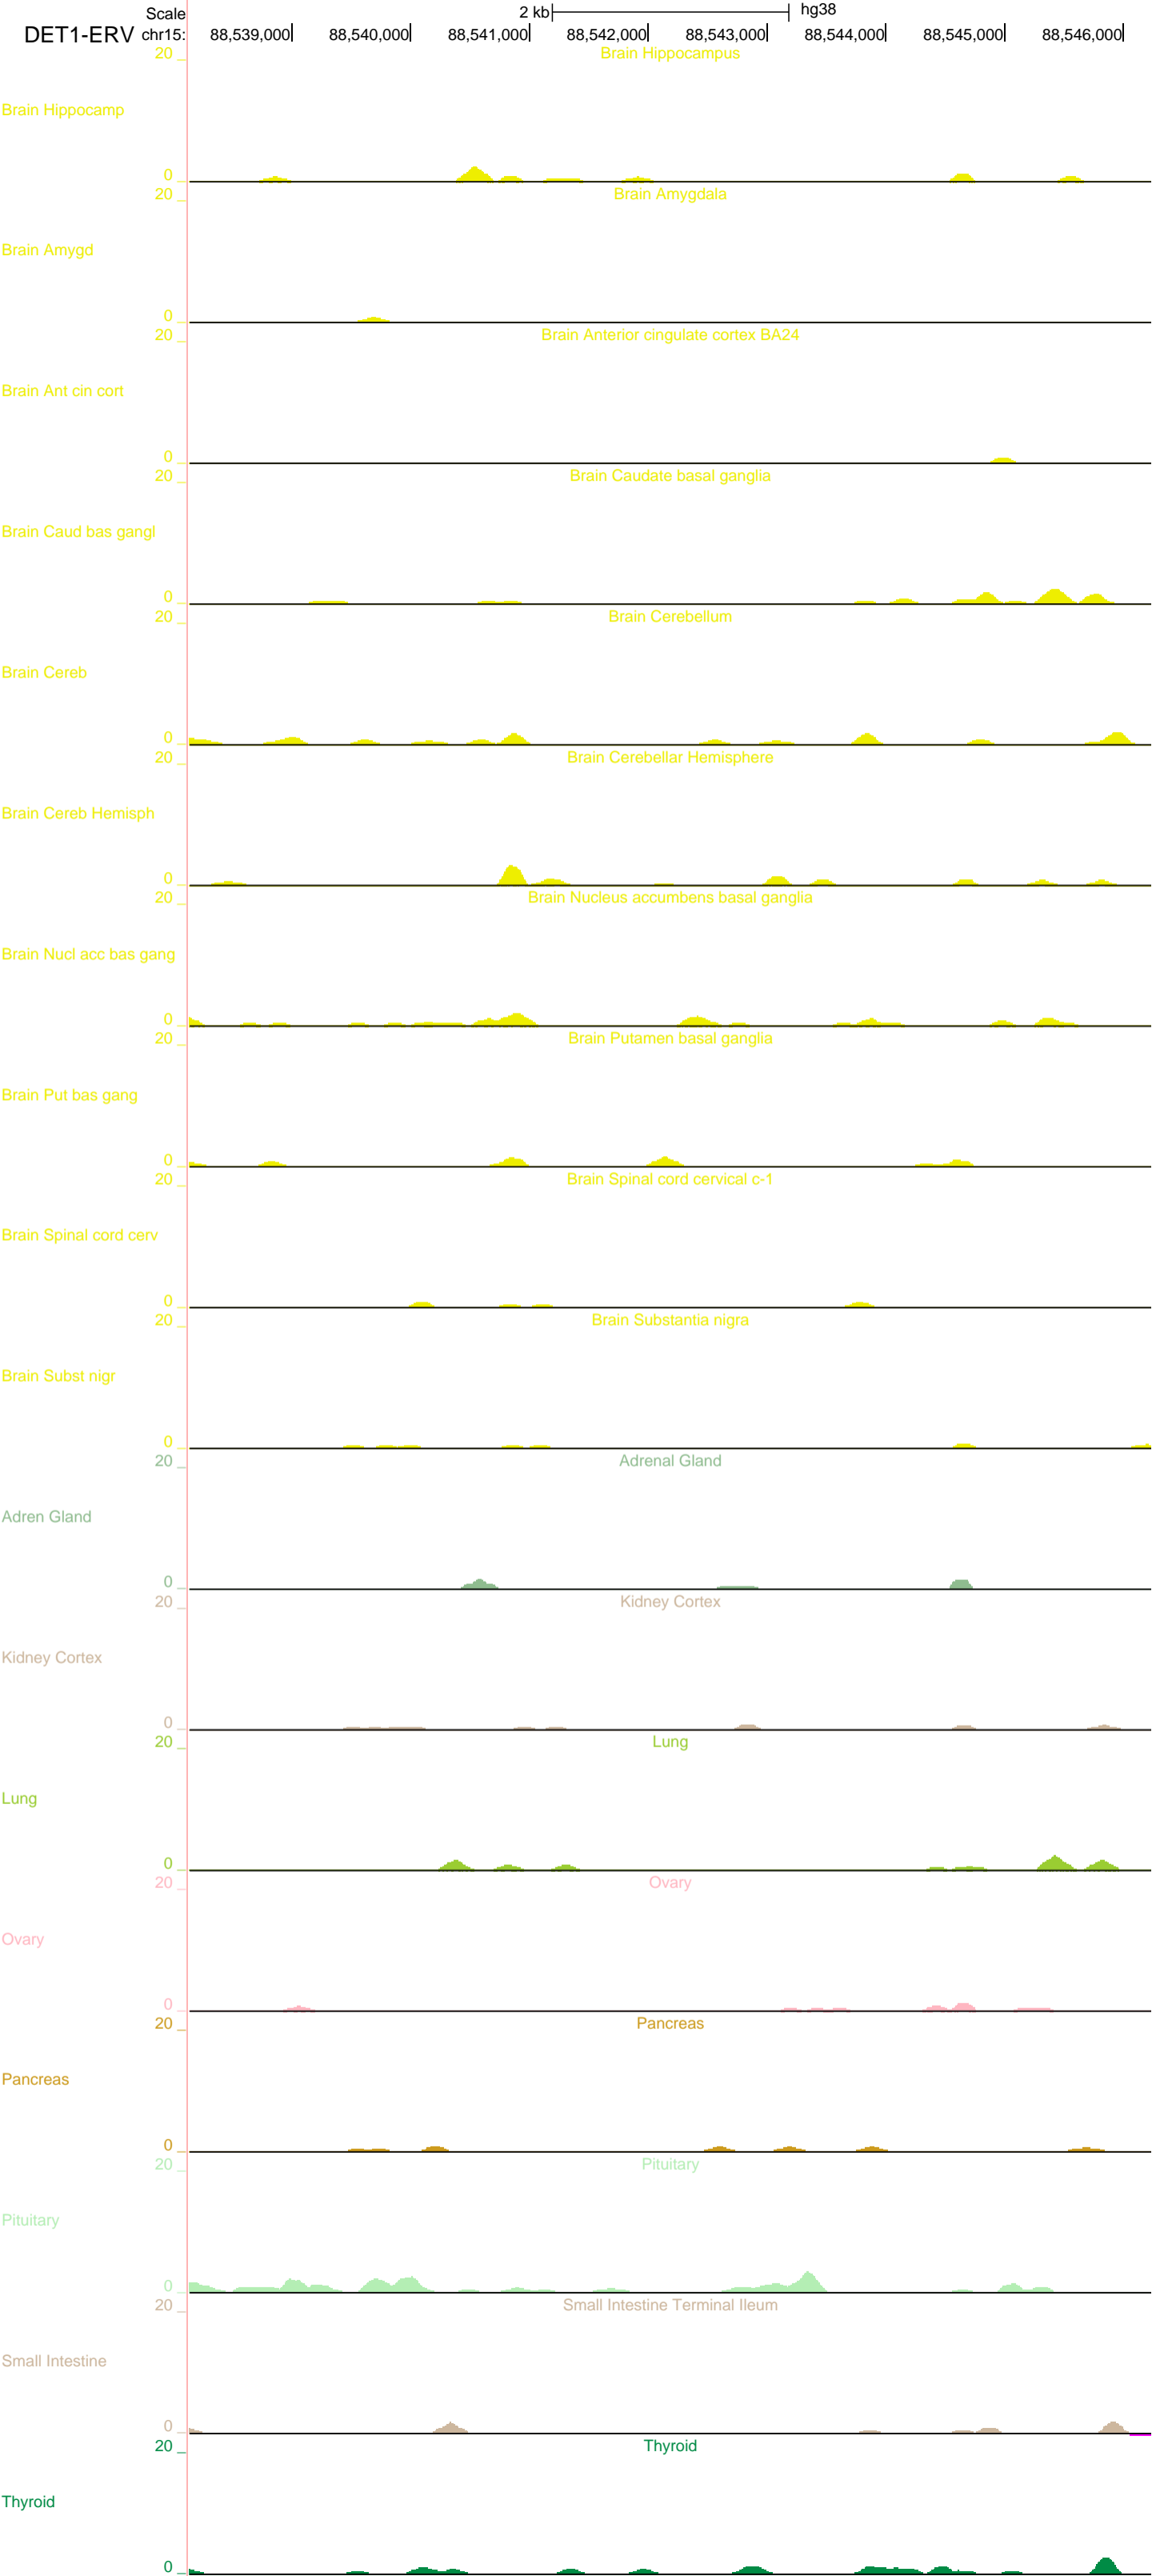

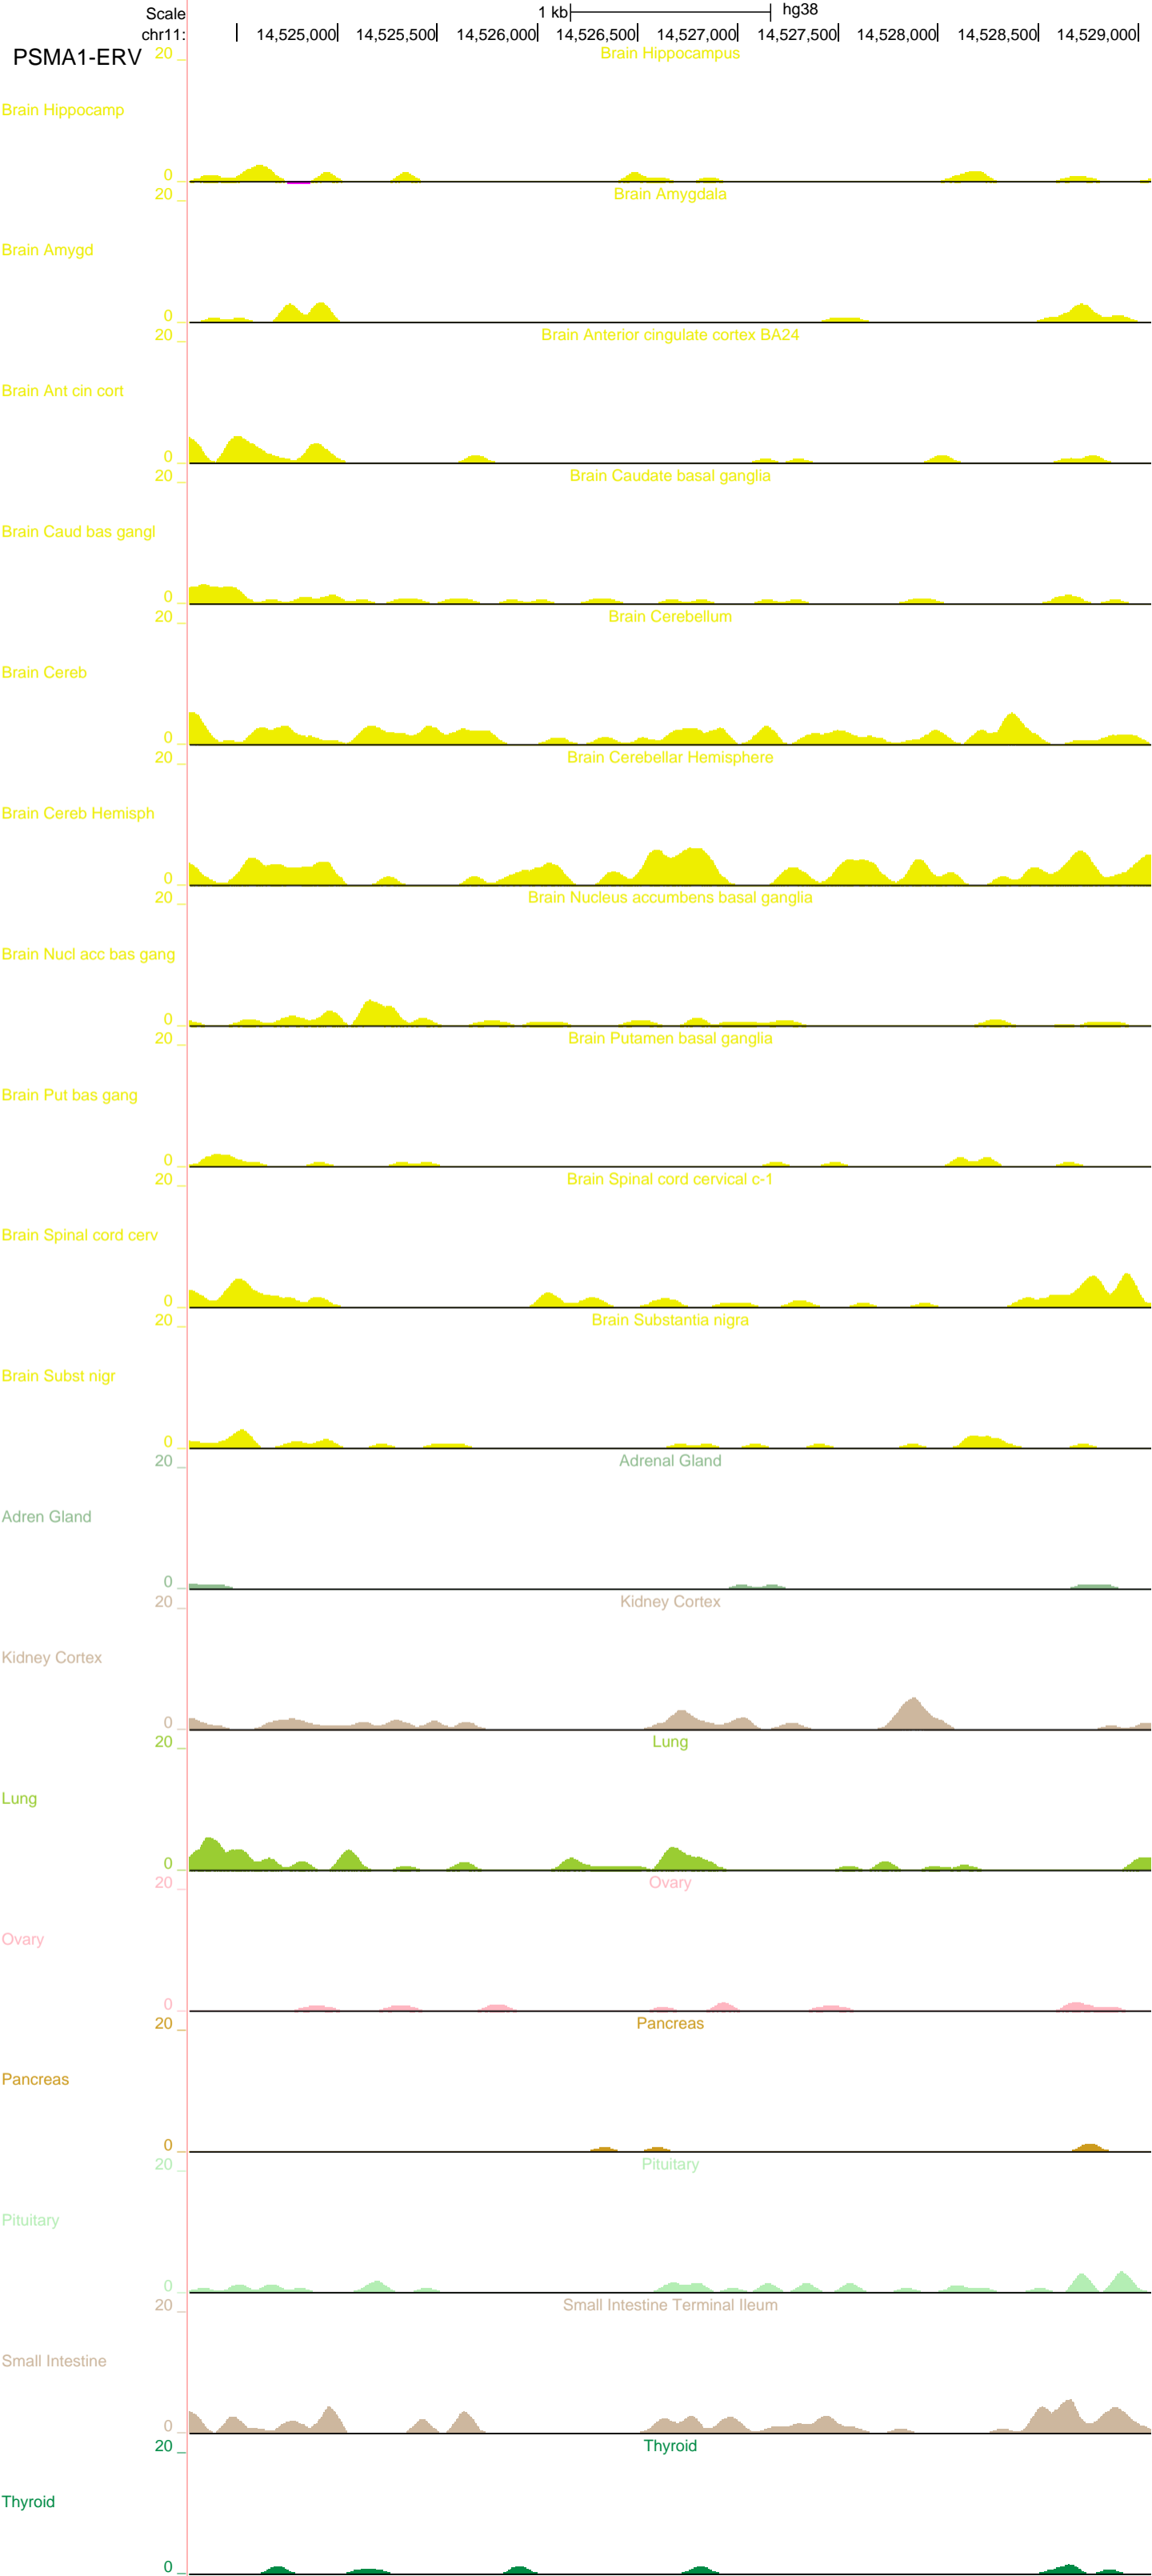



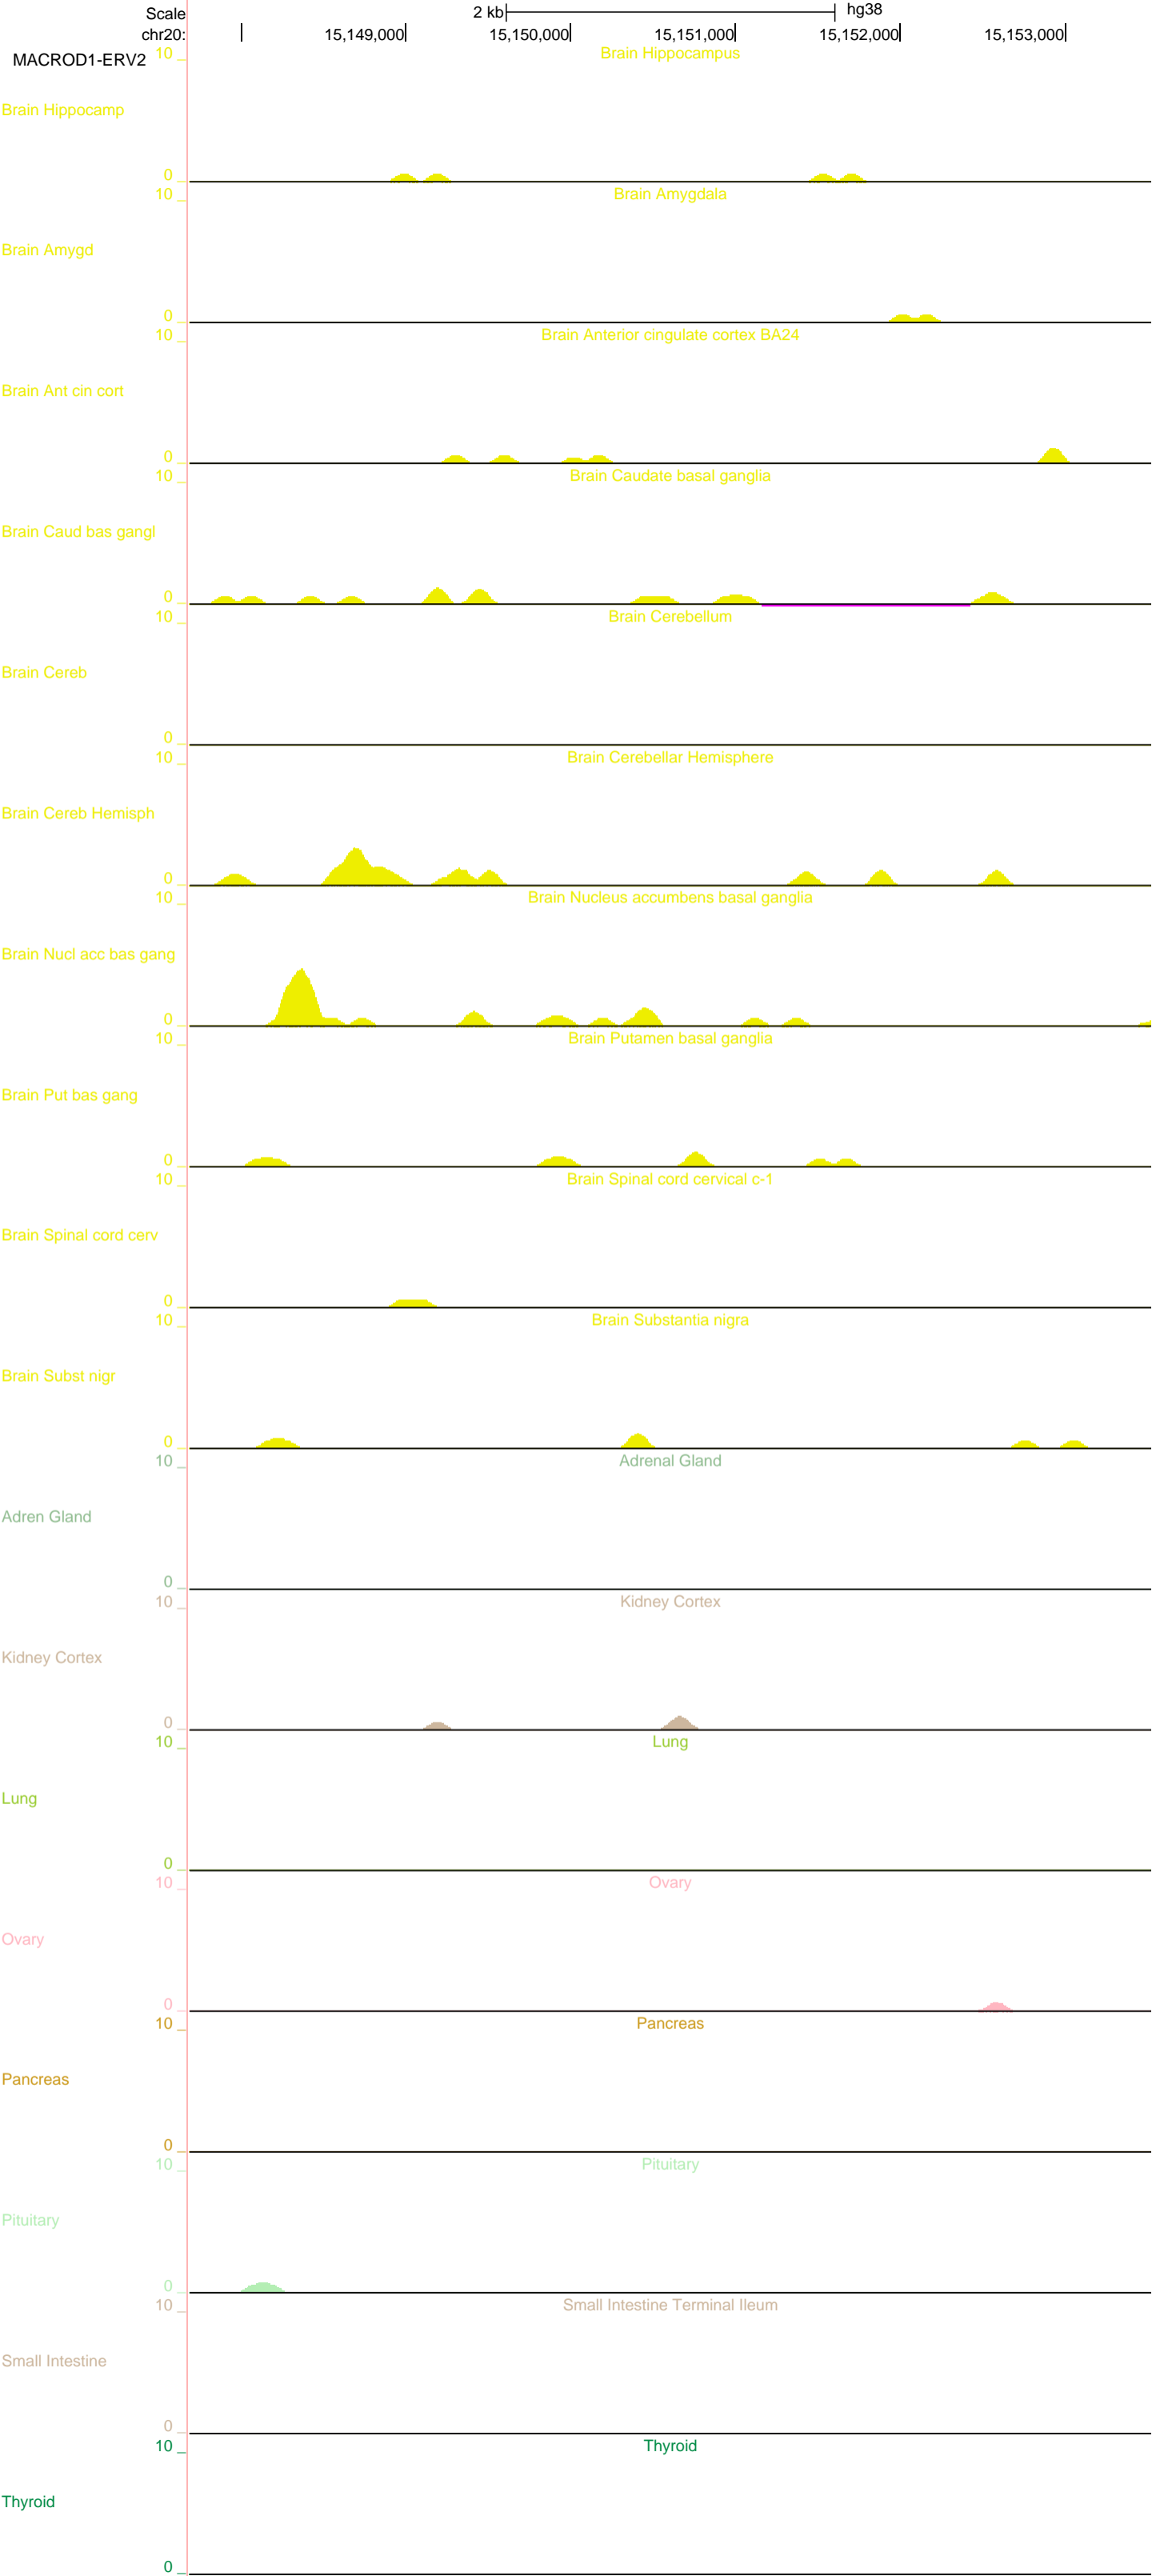

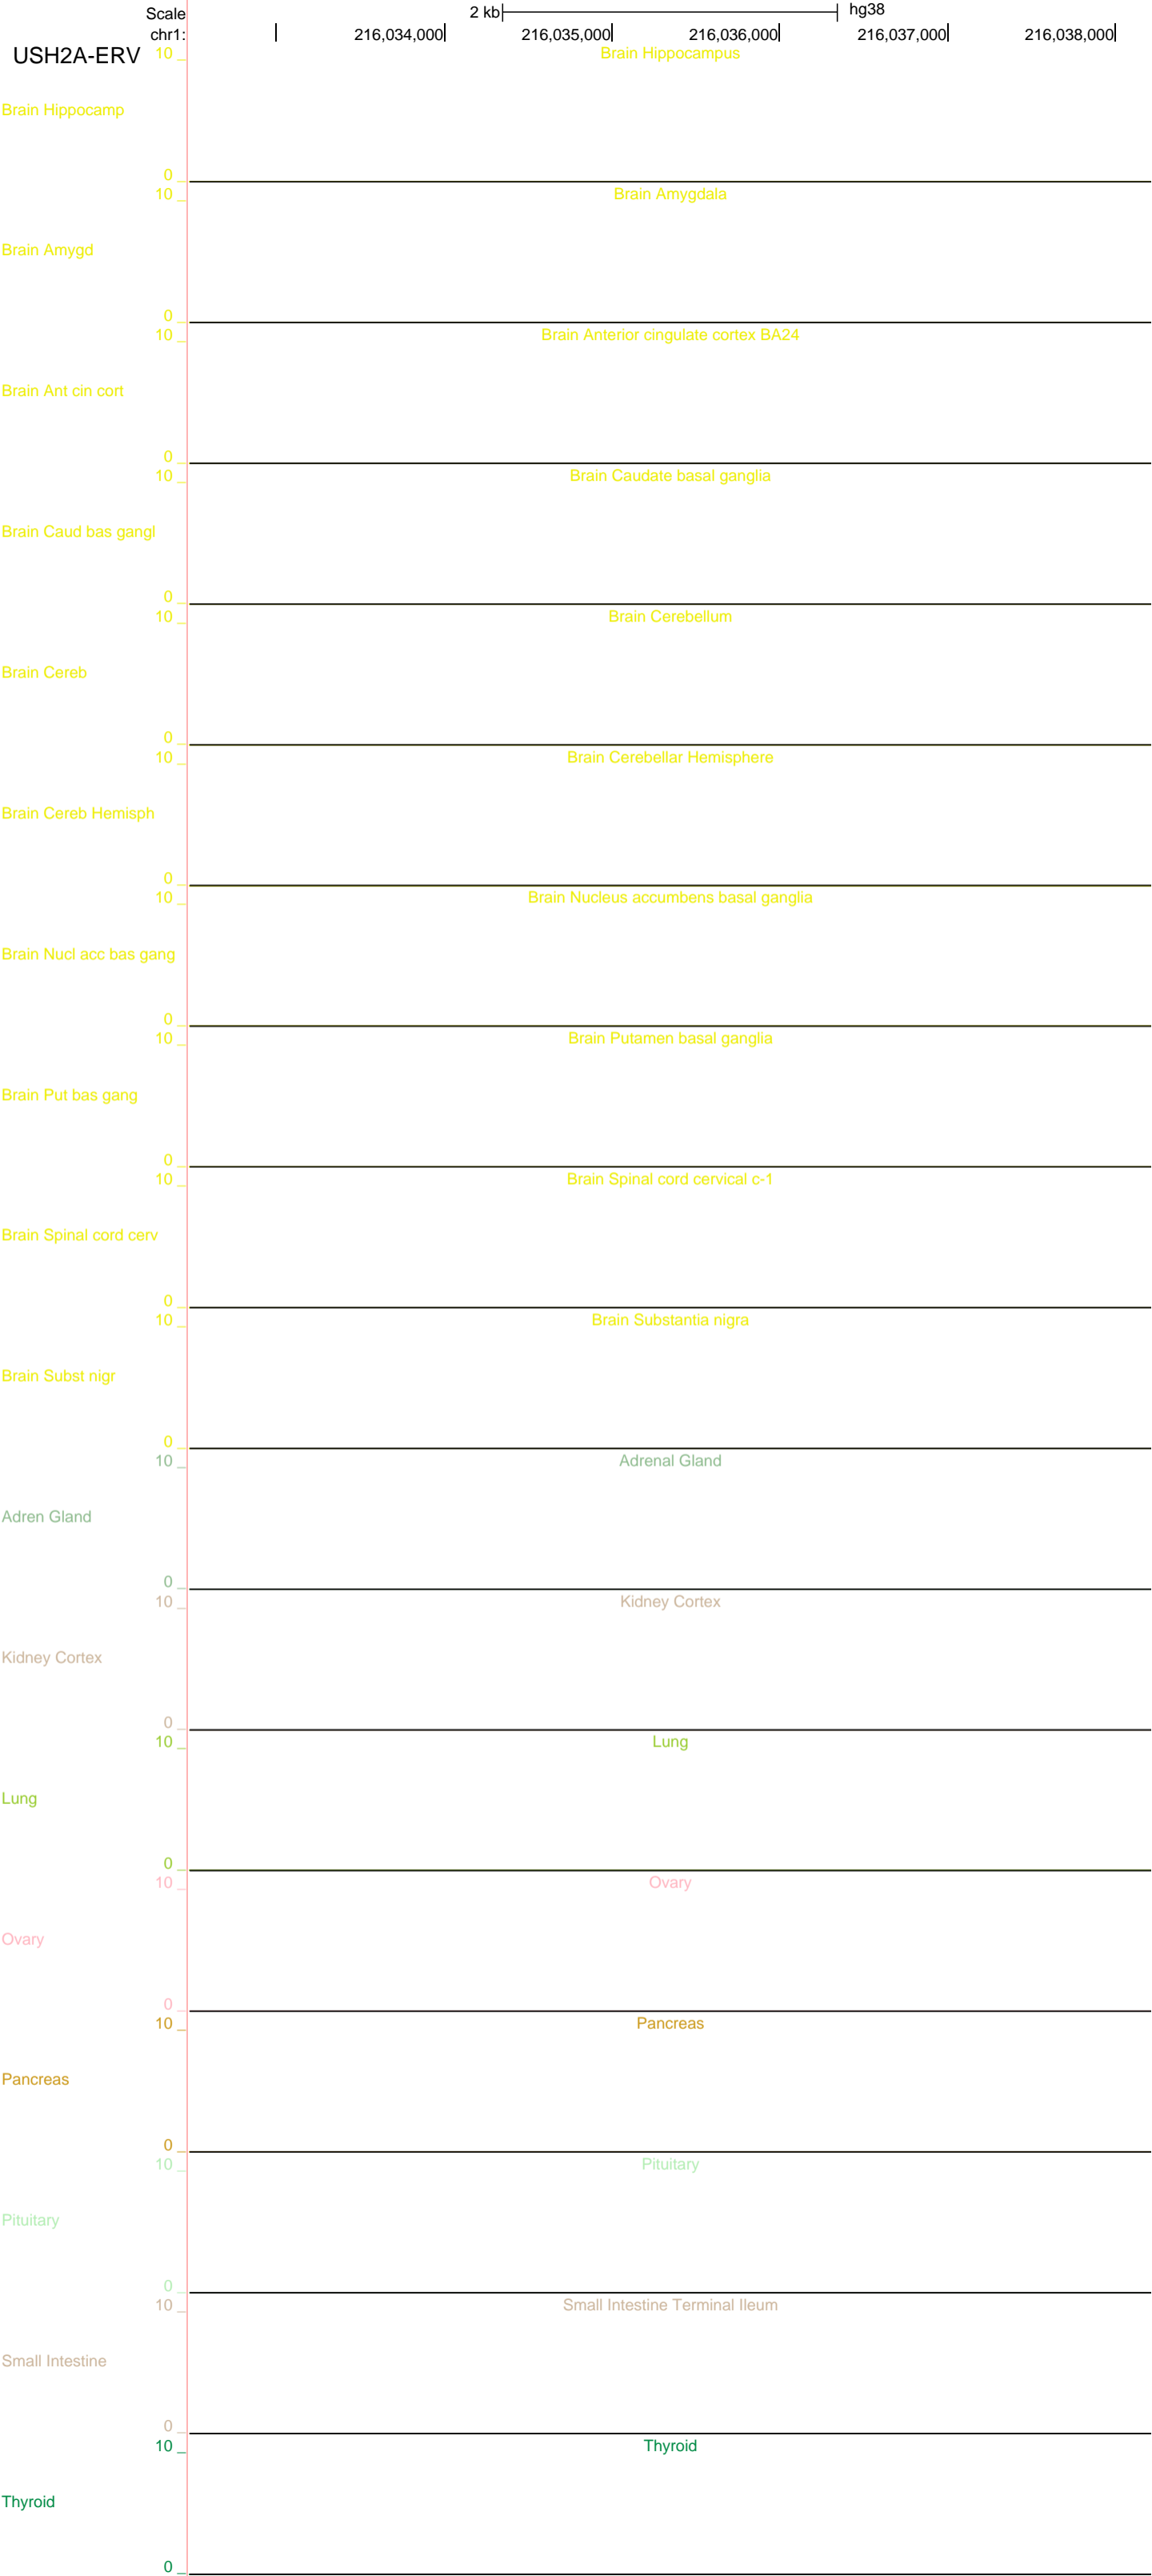

Supplement: Supplementary_file_3.pdf [file Supplementary_file_3.pdf]
